1           **Crosstalk between H2A variant-specific modifications impacts vital cell functions**

2  
3 Anna Schmücker<sup>1¶</sup>, Bingkun Lei<sup>1¶</sup>, Zdravko J. Lorković<sup>1</sup>, Matías Capella<sup>2</sup>, Sigurd Braun<sup>2,3</sup>  
4 Pierre Bourguet<sup>1,4</sup>, Olivier Mathieu<sup>4</sup>, Karl Mechtler<sup>1</sup>, and Frédéric Berger<sup>1\*</sup>  
5

6 <sup>1</sup> Gregor Mendel Institute (GMI), Austrian Academy of Sciences, Vienna BioCenter  
7 (VBC), Dr. Bohr-Gasse 3, 1030 Vienna, Austria.

8 <sup>2</sup> Biomedical Center, Department of Physiological Chemistry, Ludwig-Maximilians-University  
9 of Munich, Großhaderner Straße 9, 82152 Planegg-Martinsried, Germany

10 <sup>3</sup> International Max Planck Research School for Molecular and Cellular Life Sciences,  
11 Am Klopferspitz 18, 82152 Planegg-Martinsried, Germany

12 <sup>4</sup> CNRS, Université Clermont Auvergne, Inserm, Génétique Reproduction et Développement  
13 (GReD), F-63000 Clermont-Ferrand, France  
14

15 \*Corresponding author:  
16 Email: [Frederic.berger@gmi.oeaw.ac.at](mailto:Frederic.berger@gmi.oeaw.ac.at) (FB)  
17

18 ¶ These authors contributed equally to this work.

19 Gregor Mendel Institute of Molecular Plant Biology

20 Dr. Bohr-Gasse 3

21 1030 Vienna, Austria

22 Tel: +43-1-79044-9810

23 E-mail: [frederic.berger@gmi.oeaw.ac.at](mailto:frederic.berger@gmi.oeaw.ac.at)  
24  
25  
26  
27  
28  
29  
30  
31  
32

## 33 **Abstract**

34 Histone variants are distinguished by specific substitutions and motifs that might be subject to  
35 post-translational modifications (PTMs). Compared with the high conservation of H3 variants,  
36 the N- and C-terminal tails of H2A variants are more divergent and are potential substrates for  
37 a more complex array of PTMs, which have remained largely unexplored. We used mass  
38 spectrometry to inventory the PTMs of the two heterochromatin-enriched variants H2A.W.6  
39 and H2A.W.7 of *Arabidopsis*, which harbor the C-terminal motif KSPK. This motif is also  
40 found in macroH2A variants in animals and confers specific properties to the nucleosome. We  
41 showed that H2A.W.6 is phosphorylated by the cell cycle-dependent kinase CDKA specifically  
42 at KSPK. In contrast, this modification is absent on H2A.W.7, which also harbors the SQ motif  
43 associated with the variant H2A.X. Phosphorylation of the SQ motif is critical for the DNA  
44 damage response but is suppressed in H2A.W.7 by phosphorylation of KSPK. To identify  
45 factors involved in this suppression mechanism, we performed a synthetic screen in fission  
46 yeast expressing a mimic of the *Arabidopsis* H2A.W.7. Among those factors was the BRCT-  
47 domain protein Mdb1. We showed that phosphorylation of KSPK prevents binding of the  
48 BRCT-domain protein Mdb1 to phosphorylated SQ and as a result hampers response to DNA  
49 damage. Hence, cross-talks between motif-specific PTMs interfere with the vital functions of  
50 H2A variants. Such interference could be responsible for the mutual exclusion of specific motifs  
51 between distinct H2A variants. We conclude that sequence innovations in H2A variants have  
52 potentiated the acquisition of many specific PTMs with still unknown functions. These add a  
53 layer of complexity to the nucleosome properties and their impact in chromatin regulation.

## 54 **Introduction**

55 Histones represent the major protein component of chromatin. Histone variants evolved  
56 in all core histone families and acquired comparable properties in a convergent manner [1-4].  
57 These variants play major roles in cell fate decisions, development, and disease [5-7]. Most

58 multicellular eukaryotes contain three types of H2A variants: H2A, H2A.Z and H2A.X. The  
59 variant H2A.X is defined by the motif SQ[E/D] $\Phi$  present within the C-terminal tail (where  $\Phi$   
60 stands for a hydrophobic amino acid) that is present only at the C-terminal tail of H2A.X. The  
61 serine residue of this motif is phosphorylated during the early phase of the DNA damage  
62 response (DDR) [7-11]. In animals, serine 139 (S139) phosphorylation at the SQ motif of  
63 H2A.X ( $\gamma$ H2A.X) is sufficient to recruit the mediator of DNA damage checkpoint protein 1  
64 (MDC1) [12]. In contrast, MDC1 binding is abolished if tyrosine 142 (Y142) of  $\gamma$ H2A.X is  
65 phosphorylated. Thus, the succession of these two phosphorylation steps dictates the order of  
66 events at sites of DNA damage [13-15]. In plants and yeast, serine phosphorylation of  
67 SQ[E/D] $\Phi$  is also essential for DDR although Y142 of H2A.X is not conserved [16, 17]. At the  
68 initiation of DDR in fission yeast,  $\gamma$ H2A.X is recognized by the BRAC1 C-terminal (BRCT)  
69 domains of Crb2 [18] and Mdb1, the ortholog of human MDC1 [19]. These events are  
70 genetically redundant and initiate formation of radiation-induced nuclear foci at the site of DNA  
71 damage, which act as template for recruiting DNA repair machinery. BRCT domain-containing  
72 proteins also exist in plants, yet their functions remain unknown.

73 In *Arabidopsis*, in addition to H2A.X, DDR also relies on the plant specific variant  
74 H2A.W.7 that harbors an SQ motif at the C-terminal tail [9, 16, 20]. The family of H2A.W  
75 variants evolved in land plants, where they exclusively occupy constitutive heterochromatin,  
76 and consists of three isoforms in *Arabidopsis* (H2A.W.7, W.6 and W.12) [2, 16, 21]. H2A.W  
77 confers distinct properties to the nucleosome through differences in its primary amino acid  
78 sequence in the L1 loop, the docking domain, and the extended C-terminal tail [22]. The main  
79 feature defining H2A.W variants is the C-terminal KSPK motif [21, 23]. Due to the expected  
80 location of the H2A.W C-terminus at the nucleosome dyad (entry/exit site of the DNA into the  
81 nucleosome), the KSPK motif is placed in a functionally significant area [24] where it interacts  
82 with the linker DNA [25]. This motif is a member of the S/T-P-X-K/R motifs (where X  
83 represents any amino acid) present in macroH2A in metazoans and linker histones H1 among

84 other proteins [26-32]. Both H2A.W and macroH2A are required for heterochromatin  
85 organization, suggesting a potential convergence in the function of these histone variants [2].  
86 Incorporation of these variants confers specific biophysical properties to the nucleosomes and  
87 chromatin [1, 26, 33, 34].

88         Distinct C-terminal motifs present in specific classes of H2A variants do not usually co-  
89 occur. The KSPK is present exclusively in plant H2A.W and mammalian macroH2A, while the  
90 SQ[E/D] $\Phi$  motif is present primarily on H2A.X variants in eukaryotes [5, 9, 33, 35]. There are  
91 notable exceptions to this rule in animals and plants. *Drosophila* H2A.V combines the  
92 SQ[E/D] $\Phi$  motif with properties of H2A.Z [36]. Several species of seed-bearing plants possess  
93 a subtype of H2A.W that also harbors a SQ[E/D] $\Phi$  motif [16]. In *Arabidopsis*, H2A.X is largely  
94 excluded from constitutive heterochromatin, which is occupied by the variant H2A.W.7 that  
95 carries both the SQ[E/D] $\Phi$  and KSPK motifs. H2A.X and H2A.W.7 are essential to mediate  
96 the response to DNA damage in *Arabidopsis*, but variants similar to H2A.W.7 are present only  
97 in a restricted number of flowering plant species [16]. What led to the mutual exclusion of C-  
98 terminal motifs during H2A variant evolution has remained unclear, but one reason could be  
99 incompatibility between post-translational modifications (PTMs) on variant specific motifs.

100         Different types and combinations of PTMs of core histones coordinate the recruitment  
101 of proteins that dictate chromatin configuration and consequently regulate genome integrity and  
102 genome expression [5, 7, 15, 37-39]. Non-centromeric H3 variants share strong sequence  
103 homology and, with a few exceptions [40-42], are subjected to the same repertoire of  
104 modifications. In contrast, sequence homology between H2A variants, particularly at their N-  
105 and C-terminal tails, is much less pronounced [23, 33]. This provides opportunities for  
106 deposition of distinct patterns of modifications for each type of H2A variant [7, 43].

107         Here, we provide an inventory of PTMs of H2A.W variants in *Arabidopsis*, including  
108 some that are specific of subtypes of H2A.W variants. H2A.W.6 is phosphorylated at the serine  
109 residue of the KSPK motif, and we provide evidence that the modification is deposited by cyclin

110 dependent kinases (CDKs). In contrast, H2A.W.7 is only phosphorylated on the SQ motif.  
111 Notably, H2A.W.7 carrying a phosphomimetic KDPK motif shows impaired DDR. Through a  
112 synthetic approach in fission yeast, we show that phosphorylation of the KSPK motif prevents  
113 Mdb1 binding to the phosphorylated SQ motif and proper DDR, suggesting that the absence of  
114 KSPK phosphorylation in H2A.W.7 is essential for the SQ motif to mediate DDR in  
115 *Arabidopsis*. Hence, PTMs of C-terminal motifs of the H2A.W.7 variant interfere with each  
116 other and, during DDR this seems to be resolved by suppression of PTMs on the KSPK motif.  
117 Yet, this type of variant remains rarely present in eukaryotes. We propose that incompatibility  
118 between the PTMs carried by H2A variant specific motifs provide a possible explanation for  
119 the mutual exclusion of C-terminal motifs between H2A variants.

## 120 **Results**

### 121 **H2A.W.6 and H2A.W.7 display distinct patterns of modifications at their C-terminal tails**

122 We immunopurified mononucleosomes containing H2A.W.6 or H2A.W.7 from wild type (WT)  
123 leaves of *Arabidopsis* (Fig 1A and 1B) and performed qualitative MS analysis to identify PTMs  
124 associated with each isoform. In both isoforms, N- and C-terminal tails were modified at several  
125 lysine residues by acetylation and/or methylation (Fig 1C). A more complex set of  
126 modifications was found on the C-terminal tail of H2A.W.6, with prevalence of lysine  
127 acetylation and serine phosphorylation (Fig 1C). Although H2A.W.6 and H2A.W.7 exist  
128 primarily as homotypic (two copies of either H2A.W.6 or H2A.W.7), heterotypic (one copy of  
129 each H2A.W.6 and H2A.W.7) nucleosomes can be identified [16, 22] (Fig 1B). Importantly,  
130 H2A.W.6 and H2A.W.7 precipitated in respective and reciprocal immunoprecipitations  
131 contained similar sets of modifications (S1 Fig), suggesting that each variant isoform acquires  
132 distinct modification patterns independently of the nucleosome composition. Some of these  
133 modifications were specific to each isoform, in part due to the absence of conservation of the  
134 residues targeted by these modifications. Three lysine residues at the N-terminal tails of

135 H2A.W.6 and H2A.W.7 present in a highly conserved sequence context (KSVSKSMKAG vs.  
136 KSVSKSVKAG) showed similar PTMs in both variants. In contrast, other lysine residues at  
137 the N-termini in a less conserved context displayed isoform-specific modifications (Fig 1C).  
138 On both variants, acetylation was detected on lysine residue 128 and 144, which are embedded  
139 in the same sequence context (Fig 1C). Seedlings, leaves and flowers showed similar patterns  
140 of lysine modifications at the C-terminal tail, but they differed in their range and abundance.  
141 The three serine residues (S129, S141, and S145) at the C-terminal tail were phosphorylated on  
142 H2A.W.6 in leaves, as previously reported [44]. Based on spectral counting, the most abundant  
143 phosphorylation was S145, followed by S141 and S129; the last one being very rare.  
144 Phosphorylation of S141 and S145 were also detected on H2A.W.6 from seedlings, where a  
145 single spectrum also detected S129 phosphorylation of H2A.W.7. In flowers, only S145 was  
146 detected on H2A.W.6 (S1 Fig). Overall, the repertoire of PTMs detected on H2A.W.6 and  
147 H2A.W.7 differed markedly (Fig 1C). As S145 of the conserved KSPK motif is part of the  
148 functionally relevant C-terminal tail that protects the linker DNA [22, 23], we focused our  
149 further analysis on S145 phosphorylation. We obtained an antibody that specifically binds  
150 phosphorylated S145 in both H2A.W.6 and H2A.W.7 *in vitro* (S2 Fig). Yet, consistent with the  
151 MS data, *in vivo* KSPK phosphorylation was only detected on H2A.W.6 (Fig 1C and 1D) and  
152 we therefore named this antibody H2A.W.6p. Our data suggest that phosphorylation of the  
153 KSPK motif is deposited on H2A.W.6 but not on H2A.W.7, which can be phosphorylated on  
154 its SQ motif in response to DNA damage.

### 155 **The KSPK motif of H2A.W.7 is not phosphorylated upon DNA damage induction**

156 We investigated the modification of KSPK and SQ motifs in H2A.W.6, H2A.W.7, and H2A.X  
157 after inducing DNA damage with bleomycin treatment. In WT, bleomycin treatment induced  
158 phosphorylation of H2A.X and H2A.W.7 at the SQ motifs ( $\gamma$ H2A.X and  $\gamma$ H2A.W.7), as  
159 previously reported [16] (Fig 2A). To determine whether bleomycin treatment induced  
160 phosphorylation of KSPK on H2A.W.7, we applied two-hour treatment with bleomycin to *hta6*

161 mutant seedlings, which are deprived of H2A.W.6 and only expressed H2A.W.7 (Fig 2A).  
162 Under these conditions, KSPK phosphorylation was not detected, suggesting that DDR does  
163 not induce phosphorylation of KSPK on H2A.W.7. In conclusion, DNA damage triggers  
164 phosphorylation of the SQ motif of H2A.X and H2A.W.7, but not of the KSPK motif of  
165 H2A.W.7.

### 166 **H2A.W.6 phosphorylation is mediated by CDKA and is cell cycle dependent**

167 We observed that prolonged exposure to bleomycin caused a marked decrease of KSPK  
168 phosphorylation of H2A.W.6 (Fig 2B). As DNA damage causes cell cycle arrest [45, 46], we  
169 hypothesized that KSPK phosphorylation could be associated with cell cycle progression.  
170 Because our *Arabidopsis* cell suspension could not be synchronized, we used tobacco BY-2 cell  
171 suspension for cell cycle synchronization to address this question. In tobacco, six of the seven  
172 H2A.W isoforms contain the KSPK motif at the C-terminus, of which phosphorylation was  
173 detected by the H2A.W.6p antibody (S3A and S3B Fig). We analyzed H2A.W phosphorylation  
174 status in synchronized tobacco BY-2 cells over a twelve-hour time course after release from an  
175 aphidicolin-induced cell cycle block (S3C and S3D Fig). While H2A.W.6 levels were  
176 comparatively stable throughout the cell cycle, phosphorylation of KSPK remained stable  
177 during S and G2 but decreased during G1 phase (Fig 3A and S3E Fig). We tested whether levels  
178 of H2A.W.6p also fluctuated in dividing cells of *Arabidopsis* root tips where pairs of small flat  
179 cells in G1 are easily distinguished from larger cells in G2 phase (Fig 3B). Cells in S phase  
180 were marked by a pulse of EdU incorporation. Consistent with results obtained with  
181 synchronized BY-2 cells, *Arabidopsis* root tip nuclei in S, M, and G2 phases showed high levels  
182 of H2A.W.6 phosphorylation, whereas this mark was not detected in G1 phase nuclei (Fig 3B).  
183 This fluctuation was not the result of changes in total levels of H2A.W.6, which remained  
184 relatively uniform throughout the cell cycle (S4A Fig). These results showed that  
185 phosphorylation of H2A.W.6 is dependent on cell cycle progression.

186 We next tested the impact of cell cycle inhibition on H2A.W.6p levels. S phase arrest  
187 by treatment with hydroxyurea or aphidicolin did not affect H2A.W.6 phosphorylation in  
188 *Arabidopsis* cell suspension cultures (Fig 3C). In contrast, when we inhibited cyclin-dependent  
189 kinases (CDKs) with roscovitine [47], H2A.W.6p was almost undetectable (Fig 3C). The  
190 specificity and concentration dependence of H2A.W.6p inhibition by roscovitine (Fig 3C, S4B  
191 Fig) prompted us to examine the *Arabidopsis* cyclin-dependent kinase CDKA;1, which is  
192 predominantly active at the G1 to S-phase transition [48-50]. We immunopurified CDKA;1-  
193 YFP from *Arabidopsis* seedlings and performed an *in vitro* kinase assay with recombinant  
194 H2A.W.6-H2B, H2A.W.7-H2B, and H2A-H2B dimers (Fig 3D). We observed strong  
195 phosphorylation of the H2A.W.6-H2B and H2A.W.7-H2B dimers but no signal in the H2A-  
196 H2B control (Fig 3D), demonstrating that CDKA;1 phosphorylates H2A.W.6 and H2A.W.7 *in*  
197 *vitro*. In plants with reduced CDKA;1 kinase activity [51, 52], we detected very low levels of  
198 H2A.W.6 phosphorylation (S4C Fig), further supporting that CDKA;1 is the main kinase  
199 responsible for H2A.W.6 modification. In root tips of plants with reduced CDKA;1 kinase  
200 activity, only late G2/M-phase nuclei showed KSPK phosphorylation (S4D Fig). This  
201 suggested that another CDK phosphorylates the KSPK motif in the absence of CDKA;1, which  
202 might be CDKB;1, as it is active at the G2/M transition [49, 50, 53].

203 In conclusion, H2AW.6 is phosphorylated by cyclin-dependent kinases during the S,  
204 G2, and M phases and the modification is likely removed during the G1 phase of the cell cycle.

### 205 **Cross talk between phosphorylation at the KSPK and SQ motifs in H2A.W.7**

206 We demonstrated that CDKA;1 phosphorylates H2A.W.7 at the KSPK motif *in vitro* (Fig 3D);  
207 however, this modification was not detected *in planta* (Fig 1C and 1D, S2 Fig). We thus tested  
208 whether DNA damage induced phosphorylation of the SQ motif interferes with KSPK  
209 phosphorylation in H2A.W.7. This was not the case in *hta7* plants expressing phosphomimetic  
210 (SQ to DQ) mutant forms of H2A.W.7 [16]. Additionally, KSPK phosphorylation was also not  
211 observed when SQ phosphorylation was prevented in *hta7* plants expressing non-



212 phosphorylatable (SQ to AQ) (S5A Fig). Hence, phosphorylation of the H2A.W.7 SQ motif  
213 does not appear to interfere with KSPK phosphorylation.

214 To test the crosstalk between SQ and KSPK phosphorylation *in planta*, we attempted to  
215 complement the *hta7* mutant by expressing WT and mutant forms of H2A.W.7 (Fig 4A).  
216 Expression of a mutant form of H2A.W.7 combining the WT SQ motif with a KDPK motif that  
217 mimics phosphorylation (SQ-DP) did not rescue sensitivity of *hta7* mutant plants towards DNA  
218 damage (Fig 4B). By contrast, mutation of the KSPK motif into non-phosphorylatable KAPK  
219 (SQ-AP) rescued DDR (Fig 4B). Notably, mutations of the KSPK motif into either KAPK or  
220 KDPK did not affect SQ motif phosphorylation (Fig 4C). Thus, the presence of a negative  
221 charge at the KSPK motif does not interfere with SQ motif phosphorylation but causes DNA  
222 damage sensitivity. These results suggested that serine phosphorylation of KSPK must be  
223 prevented to execute DDR.

224 What are the factors preventing phosphorylation of KSPK in H2A.W.7? We  
225 hypothesized that the pattern of expression of H2A.W.6 and H2A.W.7 are different leading to  
226 expose these two variants to contrasting activities that deposit and maintain KSPK  
227 phosphorylation. Contrary to our hypothesis, we observed that KSPK phosphorylation in  
228 H2A.W.7 was still absent even when expressed under the control of the promoter of H2A.W.6  
229 in the *hta7* mutant (Fig 4D). Residues surrounding the KSPK motifs are distinct between  
230 H2A.W.6 and H2A.W.7. Consistently, we observed phosphorylation of KSPK of the C-  
231 terminal tail of H2A.W.6 when fused to the core of H2A.W.7 (Fig 4D). This suggested that the  
232 primary sequence of the C-tail of H2A.W.6, but not of H2A.W.7, is prone to be phosphorylated  
233 *in planta*.

#### 234 **Cross talk between phosphorylation at the KSPK is mediated by proteins containing a** 235 **BRCT domain that binds to phosphorylated SQ**

236 To further investigate a potential crosstalk between phosphorylation of the H2A.W.7 SQ and  
237 KSPK motifs, we took a synthetic approach using the fission yeast *Schizosaccharomyces*

238 *pombe*. Fission yeast possesses a relatively reduced repertoire of histone H2A variants,  
239 consisting of two H2A.X variants (*SpH2A.α* and *SpH2A.β*) and H2A.Z [54, 55]. We modified  
240 both genes encoding *SpH2A* by inserting the C-terminal tail of the *Arabidopsis* H2A.W.6 to the  
241 C-terminus of *SpH2A.α* and *SpH2A.β* that contains an SQ motif, and obtained the chimeric  
242 histone *SpH2A.W<sup>At</sup>* that possesses the motifs present in H2A.W.7 [25] (Fig 5A, S5B Fig). In  
243 dividing cells, *SpH2A.W<sup>At</sup>* localized to the nucleus and was incorporated in chromatin (Fig 5B,  
244 S5C Fig). We detected phosphorylation of *SpH2A.W<sup>At</sup>* at the KSPK motif but not in a control  
245 strain that expressed *SpH2A.W<sup>At</sup>* where KSPK was substituted by four alanine residues  
246 (*SpH2A.W4A<sup>At</sup>*) (Fig 5A and 5C). Interestingly, phosphorylation at the KSPK and SQ motifs  
247 were both detected on *SpH2A.W<sup>At</sup>* by mass spectrometry (Fig 5E, S5D Fig), demonstrating that  
248 *SpH2A.W<sup>At</sup>* phosphorylation did not prevent SQ phosphorylation. While the yeast strain  
249 expressing *SpH2A.W<sup>At</sup>* lacks H2A.X, we predicted that SQ phosphorylation of *SpH2A.W<sup>At</sup>*  
250 would be sufficient to respond to DNA damage. However, expression of *SpH2A.W<sup>At</sup>* caused  
251 hyper-sensitivity to DNA damage (Fig 5D). This suggested that either extension of the C-  
252 terminal tail or modification of the KSPK motif interfered with the DDR normally mediated by  
253 phosphorylation of the SQ motif. To test these two possibilities, we examined DNA damage  
254 sensitivity of strains expressing either *SpH2A.W<sup>At</sup>*, the KSPQ mutant *SpH2A.W4A<sup>At</sup>*, *SpH2A*  
255 with a repeated wild type C-terminal tail (*SpH2ACT*; contains two SQ motifs) or with alanine  
256 substitution of the second SQ motif (*SpH2ACT-AA*) (Fig 5A). Phosphorylation of the SQ  
257 motifs was detected in all strains and none of these modifications resulted in sensitivity to DNA  
258 damage treatment, except for *SpH2A.W<sup>At</sup>* cells (Fig 5D, S5D Fig). We thus concluded that the  
259 mere extension of the C-terminal tail is not responsible for the increased sensitivity to DNA  
260 damage in the strain expressing *SpH2A.W<sup>At</sup>*.

261 The alternative possibility is that phosphorylation of the KSPK motif specifically  
262 interfered with DDR events downstream of SQ phosphorylation. We performed an SGA

263 (synthetic gene array) screen with a genome-wide mutant library of non-essential genes to  
264 identify candidate genes that display genetic interactions with *SpH2A.W<sup>At</sup>* in presence of the  
265 drug hydroxy urea (HU). From the cluster analysis, cluster 2 contained several groups of genes  
266 genetically interacting with *SpH2A.W<sup>At</sup>*, including S/T protein kinases, S/T phosphatases and  
267 DNA repair proteins including BRCT domain proteins (Fig S6). We focused on the BRCT  
268 domain protein Mdb1 that binds to phosphorylated SQ motif in fission yeast [19]. Previous  
269 studies showed that the phosphorylated SQ motif of *SpH2A* was able to directly bind Mdb1  
270 [19]. To address directly whether presence and/or phosphorylation of KSPK motif interferes  
271 with the interaction between Mdb1 and SQ phosphorylation, we performed *in vitro* pull-down  
272 assay with synthetic biotinylated peptides (Fig 6A) and recombinant Mdb1. Mdb1 was pulled  
273 down by the phosphorylated *SpH2A* SQ peptide (SpQ) but not by the unmodified version (Fig  
274 6A). Surprisingly, Mdb1 was able to bind the phosphorylated SQ motif in the presence of the  
275 KSPK motif but not if this latter motif was phosphorylated (Fig 6A). We concluded that  
276 phosphorylation of the KSPK motif specifically interfered with DDR events downstream of SQ  
277 phosphorylation and likely prevented binding of Mdb1 to the phosphorylated SQ motif (Fig  
278 6B).

## 279 Discussion

280 In addition to the well-characterized modifications associated with histone H3, we  
281 report a series of modifications at the N- and C-terminal tails, which are either common and  
282 specific to the H2A.W family or specific to each isoform. H2A.W.6 is phosphorylated at the  
283 serine residue in the KSPK motif in a cell cycle-dependent manner. The kinase CDKA;1, which  
284 is active during S phase, is the primary writer of H2A.W.6p, but this mark might also be  
285 reinforced by plant specific B-type CDKs active at the G2/M-phase transition [48, 49, 53].  
286 When we compare modifications in H2A variants in *Arabidopsis* with other species, we find  
287 that some are plant-specific while others are found in other eukaryotes and show interesting

288 parallels. Like S145 that is specific to H2A.W, S95 is only present in H2A and H2A.X in land  
289 plants. Phosphorylation of S95 of the replicative H2A variant has been observed in *Arabidopsis*  
290 and implicated in flowering time regulation [56]. Certain isoforms of H2A.W in maize are  
291 phosphorylated at S133 during mitosis and meiosis [57]. This residue corresponds to S129 of  
292 *Arabidopsis* H2A.W and is absent from H2A.Z, H2A.X, and three out of four H2As. In yeast,  
293 the corresponding S121 is phosphorylated by Bub1 to recruit shugoshin, an important step for  
294 centromere function in chromosome segregation [58-60]. This serine is replaced by threonine  
295 (T120) in human H2A and H2A.X, and its phosphorylation is associated with transcriptional  
296 activation and mitotic chromosome segregation [61-63]. Consistent with these data, we detected  
297 only a few events of S129 phosphorylation in H2A.W in samples originating from leaves or  
298 seedlings that contain low amounts of dividing cells. The neighboring lysine 119 of H2A and  
299 corresponding lysines of H2A.X, H2A.Z, and macroH2A are well-known ubiquitination sites,  
300 associated with transcriptional repression, gene silencing, and DDR [7, 64-72].

301 Surprisingly, although KSPK of H2A.W.7 could be phosphorylated *in vitro*, this  
302 modification on H2A.W.7 did not occur *in planta*. We showed that prevention of KSPK  
303 phosphorylation in H2A.W.7 originates from the sequence of the C-terminal tail of H2A.W.7  
304 and not from its transcriptional pattern. We can speculate that *in planta*, specific modifications  
305 of the C-terminal tail of H2A.W.7 prevent the action of the cyclin dependent kinases. We  
306 addressed the biological significance of the lack of KSPK phosphorylation on H2A.W.7 *in*  
307 *planta* with a synthetic approach by engineering the endogenous H2A from *S. pombe* to create  
308 a histone variant analogous to H2A.W.7. The association of both SQ and KSPK motifs in the  
309 C-terminal tail of yeast H2A.X resulted in DNA damage sensitivity, highlighting  
310 incompatibility of such association. Results obtained *in vitro* indicate that the phosphorylation  
311 of the KSPK (S145) motif prevents BRCT domain protein Mdb1 binding to  $\gamma$ H2A.X in  
312 response to DNA damage. Transgenic *Arabidopsis* plants expressing combinations of  
313 phosphomimetic mutants in the SQ and KSPK motifs further supported this conclusion. We

314 propose that phosphorylation of S145 KSPK prevents the recognition of the phosphorylated SQ  
315 motif of H2A by an ortholog of Mdb1, which is still unknown in plants. Recruitment of the SQ  
316 motif occurred in members of the H2A.W family in various unrelated species during the  
317 evolution of flowering plants, suggesting that the mechanism that we describe in *Arabidopsis*  
318 has evolved several times and uses pre-existing components from the DDR and cell cycle.

319 Altogether our data illustrate that H2A variants extend the histone modification  
320 repertoire across eukaryotes beyond that of the extensively studied H3. Importantly, because  
321 H2A strongly impact nucleosome and chromatin properties, H2A variant specific modifications  
322 and their interplay extend the potential to modulate these properties, adding a new important  
323 layer of epigenetic complexity. Furthermore, through the example of interference between  
324 PTMs of motifs of H2A.X and of H2A.W, our findings provide a clue to explain why C-terminal  
325 motifs that identify classes of H2A variants are mutually exclusive. We propose that PTMs of  
326 these motifs mediate all or part of the function of the motifs themselves. The presence of two  
327 motifs side by side might interfere with the function of each motif, leading the emergence of  
328 distinct classes of H2A variants differentiated by specific functional motifs with distinct  
329 biological functions.

## 330 **Methods**

### 331 **Plant material**

332 The mutant lines *hta6* (SALK\_024544.32; *h2a.w.6*), *hta7* (GK\_149G05; *h2a.w.7*), and *hta12*  
333 (SAIL\_667\_G10; *h2a.w.12*) have been published [21]. Transgenic lines expressing WT and  
334 hypomorphic SQ motif mutants of H2A.W.7 in the *hta7* mutant background have been  
335 published [16]. The hypomorphic CDKA;1 D and DE mutants [51, 52] and transgenic line  
336 expressing CDKA;1-YFP in *cdka;1* mutant background [73] were a kind gift from Dr. Arp  
337 Schnittger. Primers used for genotyping hypomorphic CDKA;1 D and DE mutants (S4C Fig)  
338 were: Tg9WT/TDNA\_N049 (TGTACAAGCGAATAAAGACATTTGA), Tg9WT\_N048

339 (CAGATCTCTTCCTGGTTATTCACA), and Tg9TDNASalk\_LB\_J504  
340 (GCGTGGACCGCTTGCTGCAACTCTCTCAGG). Unless otherwise stated, plants were  
341 grown in a fully automated climate chamber at 21°C, under long day conditions.

342 To construct mutant versions of H2A.W.7 containing either WT SQ motif or mutated  
343 SQ motif into AQ in combination with phosphomimic and nonphosphorylatable versions of the  
344 KSPK motif (KDPK or KAPK, respectively), a two-step PCR reaction was performed using  
345 previously described constructs expressing H2A.W.7 containing either the WT SQ or mutated  
346 AQ motif [16] as templates. For the first step amplification, the following primer pairs were  
347 used: W7-fw (GTACTCTAGAGAGGCATAGATACCGCGCCATC) with either W7-  
348 Rev1KDP (AGGATCTTTGGTAGCAGAAG) or W7-Rev1KAP  
349 (AGGAGCTTTGGTAGCAGAAG). The second PCR step used the W7-Rev2KDP  
350 (AGCAGGATCCAGCCTTCTTAGGATCTTTGGT) or W7-Rev2KAP  
351 (AGCAGGATCCAGCCTTCTTAGGAGCTTTGGT) as reverse primers with the same  
352 forward primer as above. The mutant *HTA7* fragments were cut with *Bam*HI and *Xba*I and  
353 ligated into pCBK02. *hta7* mutant plants were transformed by the floral dip method and  
354 transgenic plants were selected on MS plates containing 10 µg/ml of phosphinothricin. The T3  
355 and T4 homozygous seeds containing single transgene copy were used for experiments.  
356 For swapping the promoters and tails of H2A.W.6 and H2A.W.7, cloning primers (S1 Table)  
357 were used to amplify the different fragments from genomic DNA of *Arabidopsis* seedlings. We  
358 created the green gate entry modules following previously published protocol [74]. The  
359 promotor fragments were introduced into the A-B empty vector, the full H2A.W.6 and  
360 H2A.W.7 as well as the N-terminal+core fragments were introduced into the C-D empty vector  
361 and the tail fragments were introduced into the D-E empty vectors. The Ub10 Terminator in the  
362 E-F entry vector and the selection based on seed coat YFP fluorescence were a gift from Yasin  
363 Dagdas laboratory. For the final greengate reaction pGGZ003\_ccdB, the entry clones were  
364 combined with empty destination vector. The final constructs were transformed into the triple

365 *hta6 hta7 hta12* mutant which is a complete knock-out line deprived of H2A.W described in  
366 the preprint doi: <https://doi.org/10.1101/2020.03.19.998609>.

367 .

368 **Isolation of nuclei, micrococcal nuclease (MNase) chromatin digestions,**  
369 **immunoprecipitation, and SDS-PAGE**

370 Nuclei isolation, MNase digestion, and immunoprecipitation were performed as previously  
371 described [16] by using 4 grams of 2-3 week old leaves for each antibody. Isolated nuclei were  
372 washed once in 1 ml of N buffer (15 mM Tris-HCl pH 7.5, 60 mM KCl, 15 mM NaCl, 5 mM  
373 MgCl<sub>2</sub>, 1 mM CaCl<sub>2</sub>, 250 mM sucrose, 1 mM DTT, 10 mM β-glycerophosphate) supplemented  
374 with protease and phosphatase inhibitors (Roche). After centrifuging for 5 min at 1,800 × g at  
375 4°C, nuclei were re-suspended in N buffer to a volume of 1 ml. Twenty μl of MNase (0.1 u/μl)  
376 (SigmaAldrich) were added to each tube and incubated for 15 min at 37°C. During the  
377 incubation, nuclei were mixed 4 times by inverting the tubes. MNase digestion was stopped on  
378 ice by the addition of 110 μl of MNase stop solution (100 mM EDTA, 100 mM EGTA). Nuclei  
379 were lysed by the addition of 110 μl of 5 M NaCl (final concentration of 500 mM NaCl). The  
380 suspension was mixed by inverting the tubes and they were then kept on ice for 15 min. Extracts  
381 were cleared by centrifugation for 10 min at 20,000 × g at 4°C. Supernatants were collected and  
382 centrifuged again as above. For each immunoprecipitation extract, an equivalent of 4 g of leaf  
383 material was used, usually in a volume of 1 ml. To control MNase digestion efficiency, 200 μl  
384 of the extract were kept for DNA extraction. Antibodies, including non-specific IgG from  
385 rabbit, were bound to protein A magnetic beads (GE Healthcare) and then incubated with  
386 MNase extracts over night at 4°C. Beads were washed 2 times with N buffer without sucrose  
387 containing 300 mM NaCl, followed by 3 washes with N buffer containing 500 mM NaCl  
388 without sucrose, and 1 wash with N buffer without sucrose, containing 150 mM NaCl. Beads  
389 were incubated 2 times with 15 μl of hot loading buffer for 5 min and supernatants were

390 removed and combined. Proteins were resolved on 4-20% gradient gels (Serva) and silver  
391 stained.

### 392 **Generation of antibodies, isolation of nuclei, SDS-PAGE, and western blotting**

393 Antibodies against H2A.X, H2A.W.6, H2A.W.7,  $\gamma$ H2A.X, and  $\gamma$ H2A.W.7 have been described  
394 [16, 21]. Antibodies against the H2A.W.6 phosphopeptide (CEEKATKSPVKSpPKKA) were  
395 raised in rabbits (Eurogentec) and purified by peptide affinity column. Purified IgG fractions  
396 were tested for specificity on peptide arrays containing serial dilutions of non-phosphorylated  
397 and phosphorylated peptides (phospho-serine specific antibodies).

398 Nuclei for western blot analyses were prepared from 300 mg of tissue (10-12 day old  
399 treated seedlings) as described [16]. Tissue was frozen in liquid nitrogen and disrupted in 15  
400 ml Falcon tubes by rigorous vortexing with 5 small ceramic beads. Ten ml of nuclei isolation  
401 buffer (NIB; 10 mM MES-KOH pH 5.3, 10 mM NaCl, 10 mM KCl, 250 mM sucrose, 2.5 mM  
402 EDTA, 2.5 mM  $\beta$ -mercaptoethanol, 0.1 mM spermine, 0.1 mM spermidine, 0.3% Triton X-  
403 100), supplemented with protease and phosphatase inhibitors (Roche) were added followed by  
404 short vortexing to obtain a fine suspension. The suspension was filtered through 2 layers of  
405 Miracloth (Merck Millipore) into 50 ml Falcon tubes, followed by washing the Miracloth with  
406 NIB. The sample was centrifuged at 3,000 rpm for 5 min at 4°C. The pellet was resuspended in  
407 NIB buffer and transferred into an Eppendorf tube. The sample was centrifuged for 2 min at  
408 4°C at full speed and the resulting pellet was resuspended in 0.3  $\times$  PBS in 1  $\times$  Laemmli loading  
409 buffer. The sample was then boiled for 5 min and immediately centrifuged for 2 min at  
410 maximum speed to remove starch and other large particles. For western blot analyses, 10  $\mu$ l for  
411 histone variants, 20  $\mu$ l for histone modifications, and 10  $\mu$ l for H3, used as a loading control,  
412 were loaded per lane. Western blots with phospho-specific antibodies were performed in  
413 solutions containing TBS instead of PBS and, after blocking, the membranes were incubated  
414 with primary antibody in TBS without milk.



415 Antibodies against H2A.X, H2A.W.6, H2A.W.7,  $\gamma$ H2A.X, and  $\gamma$ H2A.W.7 [16, 21], as  
416 well as H2A.W.6p (this work), H3 (ab1791, Abcam), CDK (PSTAIR, Sigma P7962), and  
417 CDKY15p (Cell Signaling Technology) were used at 1:1,000 dilution and secondary  
418 antibodies, HRP conjugated goat anti-rabbit and goat anti-mouse, at 1:10,000. Signals were  
419 detected using the chemiluminescence kit (ThermoFisher), recorded using an ImageDoc  
420 instrument (BioRad), exported to Photoshop, and prepared for publication. Quantification of  
421 western blots was done with ImageLab 5.2 software (BioRad) using the volume tool. For  
422 detection of Y15 phosphorylation of CDK, the manufacturer's protocol was followed.

### 423 **Nano LC-MS/MS analysis**

424 Histone bands corresponding to H2A.W.6/H2A.W.7 from *Arabidopsis* and  
425 *SpH2A/SpH2A.W/SpH2A.W4A* from fission yeast were excised from silver stained gels,  
426 reduced, alkylated, in-gel trypsin, LysC, and subtilisin digested, and processed for MS. The  
427 nano HPLC system used was a Dionex UltiMate 3000 HPLC RSLC (Thermo Fisher Scientific,  
428 Amsterdam, Netherlands) coupled to a Q Exactive HF mass spectrometer (Thermo Fisher  
429 Scientific, Bremen, Germany), equipped with a Proxeon nanospray source (Thermo Fisher  
430 Scientific, Odense, Denmark). Peptides were loaded onto a trap column (Thermo Fisher  
431 Scientific, Amsterdam, Netherlands, PepMap C18, 5 mm  $\times$  300  $\mu$ m ID, 5  $\mu$ m particles, 100  $\text{\AA}$   
432 pore size) at a flow rate of 25  $\mu$ l/min using 0.1% TFA as the mobile phase. After 10 min, the  
433 trap column was switched in line with the analytical column (Thermo Fisher Scientific,  
434 Amsterdam, Netherlands, PepMap C18, 500 mm  $\times$  75  $\mu$ m ID, 2  $\mu$ m, 100  $\text{\AA}$ ). Peptides were  
435 eluted using a flow rate of 230 nl/min, and a binary 1-hour gradient.

436 The Q Exactive HF mass spectrometer was operated in data-dependent mode, using a  
437 full scan ( $m/z$  range 380-1500, nominal resolution of 60,000, target value 1E6) followed by  
438 MS/MS scans of the 10 most abundant ions. MS/MS spectra were acquired using normalized  
439 collision energy of 27%, isolation width of 1.4  $m/z$ , resolution of 30,000 and the target value

440 was set to 1E5. Precursor ions selected for fragmentation (exclude charge state 1, 7, 8, >8) were  
441 put on a dynamic exclusion list for 20 s. Additionally, the minimum AGC target was set to 5E3  
442 and intensity threshold was calculated to be 4.8E4. The peptide match feature was set to  
443 preferred and the exclude isotopes feature was enabled. For peptide identification, the RAW  
444 files were loaded into Proteome Discoverer (version 2.1.0.81, Thermo Scientific). All hereby  
445 created MS/MS spectra were searched using Mascot 2.2.7 against a database which contains all  
446 histone variants from *Arabidopsis thaliana*. The following search parameters were used: Beta-  
447 methylthiolation on cysteine was set as a fixed modification, oxidation on methionine,  
448 deamidation on asparagine and glutamine, acetylation on lysine, phosphorylation on serine,  
449 threonine and tyrosine, methylation and di-methylation on lysine and arginine and tri-  
450 methylation on lysine were set as variable modifications. Monoisotopic masses were searched  
451 within unrestricted protein masses for tryptic enzymatic specificity. The peptide mass tolerance  
452 was set to  $\pm 5$  ppm and the fragment mass tolerance to  $\pm 0.03$  Da. The result was filtered to 1%  
453 FDR at the peptide level using the Percolator algorithm integrated in Thermo Proteome  
454 Discoverer and additional a minimum Mascot score of 20. In addition, we have checked the  
455 quality of the MS/MS spectra manually. The localization of the phosphorylation sites within  
456 the peptides was performed with ptmRS using a probability threshold of minimum 75 [75].

#### 457 **DNA damage sensitivity assays**

458 For the true leaf assay, sterilized seeds were put on MS plates containing 50  $\mu\text{g/ml}$  of zeocin  
459 (Invitrogen) and, after stratification at 4°C for 3 days, germinated under long day conditions.  
460 Development of true leaves was scored 12 days after germination. For analysis of H2A.W.7,  
461 H2A.X, and H2A.W.6 phosphorylation in response to DNA damage, 300 mg of twelve-day old  
462 seedlings germinated and grown on MS plates under long day conditions were treated in liquid  
463 MS medium with 20  $\mu\text{g/ml}$  bleomycin (Calbiochem) for the indicated time periods or for 2

464 hours with 20  $\mu\text{g/ml}$  bleomycin. After treatment, seedlings were removed from medium and  
465 shock frozen in liquid nitrogen for nuclei isolation and western blot analysis as described above.

#### 466 **Cell cycle synchronization of BY-2 cell suspension culture with aphidicolin**

467 The BY-2 cell suspension culture was sub-cultured every 2 weeks by adding 1 ml of the  
468 previous culture to 50 ml fresh BY-2 media. The culture was kept in the dark and under constant  
469 shaking at 130 rpm at room temperature. For cell cycle synchronization, a previously published  
470 protocol was followed [76]. In short, 1.5 ml of stationary BY-2 cells were added to 95 ml of  
471 fresh BY-2 media and grown for 5 days at 27°C. This culture was diluted 4 times with fresh  
472 BY-2 media and then treated with 20  $\mu\text{g/ml}$  aphidicolin (1 mg/ml; SigmaAldrich) for 24 hours  
473 at 27°C to reach a cell cycle block. To release the cells from this block, the cells were passed  
474 over a 40  $\mu\text{m}$  sieve, washed with fresh media, and resuspended in 100 ml of fresh media and  
475 followed in a time course of 12 hours. Every hour, a sample was taken for western blotting and  
476 flow cytometry analysis. For western blotting, 5 ml of cells were collected with a 50  $\mu\text{m}$  sieve  
477 and immediately frozen in liquid nitrogen. To extract proteins, samples were crushed with a  
478 small pestle in an Eppendorf tube and mixed with 200-250  $\mu\text{l}$  of 1  $\times$  loading buffer in 1  $\times$  PBS.  
479 Samples were boiled for 5 min at 99°C followed by centrifugation at full speed for 5 min.  
480 Fifteen  $\mu\text{l}$  were loaded onto 15% SDS-PAGE gels and analyzed by western blotting.

481 For the flow cytometry analysis, 2 ml of cells were collected with a 50  $\mu\text{m}$  sieve. The  
482 cells were resuspended in a small Petri dish in 400  $\mu\text{l}$  of extraction buffer (CyStain UV Precise  
483 P kit from Sysmex) and chopped with a razor blade. The sample was transferred onto a 50  $\mu\text{m}$   
484 CellTrics Disposable filter (Partec), placed on top of a flow cytometry tube, and 1,5 ml of DAPI  
485 stain solution (CyStain UV Precise P kit from Sysmex) was added to the sieve. The samples  
486 were then analyzed by the Partec flow cytometer with a gain set to 380.

#### 487 **Staining of *Arabidopsis* roots with EdU**

488 For the whole mount EdU staining and immunostaining with the phosphorylation specific  
489 antibody in roots, the protocol for the Click-iT EdU imaging kit from Invitrogen was combined

490 with the protocol from [77]. *Arabidopsis* plants were grown on MS plates for 1 week and fifteen  
491 seedlings were incubated for 1 hour in liquid MS media containing 10  $\mu$ M EdU at room  
492 temperature. The seedlings were washed twice with MS media to remove the EdU. The roots  
493 were cut off and transferred into an Eppendorf tube with fixative solution, incubated for 1 hour  
494 at room temperature, and washed twice for 10 min with 1 $\times$ PBS and twice for 5 min with water.  
495 The roots were transferred to the microscope slide and allowed to dry. The material was then  
496 rehydrated by adding 1  $\times$  PBS for 5 min followed by incubation with 2% driselase (Sigma) for  
497 60 min at 37°C in a moisture chamber to remove the cell wall. The roots were washed 6 times  
498 for 5 min with 1 $\times$ PBS at room temperature. Mixture of 3% IGEPAL CA-630 plus 10% DMSO  
499 was added to the slide and incubated for 60 min at room temperature. The solution was  
500 removed, and the slides were washed 8 times with 1  $\times$  PBS for 5 min. The slides were then  
501 incubated with 3% BSA in 1  $\times$  PBS for 5 min before revealing EdU incorporation with the  
502 Click-iT reaction buffer. After this reaction, the slides were washed once for 5 min with 3%  
503 BSA in 1  $\times$  PBS followed by blocking for 60 min at room temperature with 3% BSA in 1  $\times$   
504 PBS. Approximately 150  $\mu$ l of the primary antibody diluted 1:100 in 3% BSA 1  $\times$  PBS was  
505 added to the slides and incubated for 4 hours at 37°C in a humid chamber and then overnight at  
506 4°C. Before incubating with the secondary antibody, the slides were washed 5 times with 1  $\times$   
507 PBS for 10 min at room temperature. Alexa flour 555 labelled goat anti-rabbit IgG (Life  
508 Technologies) diluted 1:200 in 1  $\times$  PBS containing 3% BSA was added to slides and incubated  
509 for 3 hours at 37°C in a humid chamber. Finally, slides were again washed 5 times for 10 min  
510 with 1  $\times$  PBS at room temperature and mounted in Vectashield (Vector Laboratories) with 1  
511  $\mu$ g/ml DAPI. Slides were examined on an LSC confocal microscope (Carl Zeiss) and confocal  
512 sections were acquired with a 40  $\times$  oil objective, exported to Adobe Photoshop, and prepared  
513 for publication.

514 **Treatment of *Arabidopsis* cell suspension with cell cycle inhibitors**

515 The T87 cell suspension was grown on a shaker at 130 rpm under constant light. For treatment  
516 with different cell cycle inhibitors, 5 ml of the 7-day old culture were mixed with 5 ml of fresh  
517 BY-2 media supplemented with the indicated amounts of the inhibitors. The concentrations that  
518 were used for the treatment were: 50  $\mu$ M roscovitine (50 mM solution from Merck); 10 mM  
519 hydroxyurea (SigmaAldrich); 4  $\mu$ g/ml aphidicolin (SigmaAldrich). Cells were incubated with  
520 the inhibitors for 24 hours and subsequently collected by removing the media with a 50  $\mu$ m  
521 mesh, shock frozen in liquid nitrogen, and stored at -80°C.

522 For treatment of cell suspension cultures with different concentrations of roscovitine, a  
523 7-day old *Arabidopsis* T87 culture was diluted in BY-2 media to an OD<sub>600</sub> of 0.167. 10 ml of  
524 the diluted culture were incubated for 24 hours with or without 10  $\mu$ M, 20  $\mu$ M, 30  $\mu$ M, 40  $\mu$ M,  
525 and 50  $\mu$ M roscovitine with shaking under constant light. Seven ml of each sample were  
526 collected, and the cells were disrupted with ceramic beads and immediately mixed with 1  $\times$   
527 Laemmli loading buffer in 0.3  $\times$  PBS without prior enrichment of nuclei.

#### 528 **Immunoprecipitation of CDKA;1 from *cdka*-/- CDKA;1::YFP plants**

529 For immunoprecipitation, 1.5 g of 15 day old CDKA;1::YFP *cdka*-/- [73] and WT seedlings  
530 grown on MS plates were crushed in liquid nitrogen and powder was resuspended in PEB400  
531 buffer (50 mM HEPES-KOH pH 7.9, 400 mM KCl, 1 mM DTT, 2.5 mM MgCl<sub>2</sub>, 1 mM EDTA,  
532 0.1% Triton X-100) [78] supplemented with protease inhibitor cocktail (Roche) (100  $\mu$ l of  
533 buffer per 100 mg of seedlings) and the suspension was incubated on ice for 10 minutes. The  
534 samples were centrifuged for 10 min at full speed at 4°C. The supernatants were transferred to  
535 a new tube and centrifuged as above. The volume of the sample was measured and the same  
536 volume of PEB buffer without KCl was added to obtain the PEB buffer with 200 mM KCl. At  
537 this step, an input aliquot was taken and mixed with 5  $\times$  loading buffer. Agarose beads coupled  
538 with GFP nanobodies (40  $\mu$ l; VBC Molecular Biology Services) were washed twice with  
539 PEB200 and the protein extracts were added to the beads and the mixture was incubated  
540 overnight at 4°C on a rotating wheel. The beads were washed 3 times with 1 ml of PEB200

541 followed by 2 washes with kinase buffer (20 mM Tris-HCl pH7.5, 50 mM KCl, 5 mM MgCl<sub>2</sub>,  
542 1 mM DTT) if they were used for the *in vitro* kinase assay. To analyze immunoprecipitations  
543 by SDS-PAGE and western blotting, 30 µl of 1 × loading buffer in PEB200 were added to the  
544 beads. After boiling for 5 min, the supernatants were loaded onto a 12% SDS-PAGE gel.

#### 545 ***In vitro* phosphorylation assay**

546 For the kinase assay, 10 µl of kinase buffer were added to the agarose beads with the  
547 immunoprecipitated CDKA;1-YFP. One µg of the reconstituted histone dimers (H2A.W.6-  
548 H2B.9, H2A.W.7-H2B.9, H2A.13-H2B.9) and 200 µM ATP were added and the reaction was  
549 mixed before incubating for 35 min at 30°C. As a control, 20 µl kinase buffer were mixed with  
550 the dimers and ATP for 35 min at 30°C. Reactions were stopped by adding 5× loading buffer  
551 and analyzed by SDS-PAGE followed by western blotting with H2A.W.6p antibody.

#### 552 **Cloning of H2A.W.7 into overexpression vector pET15b**

553 cDNA encoding H2A.W.7 was PCR amplified from a seedling cDNA library using the  
554 following primers: W7pET15bfor (GCATCCATATGGAGTCATCACA) and W7pET15brev  
555 (CTAATGGATCCTCAAGCCTTCTT). The PCR product was cleaned using the PCR  
556 purification kit from Qiagen, digested with *NdeI/BamHI*, gel purified, and ligated into  
557 *NdeI/BamHI* opened pET15b (Novagene). Plasmids for expression of His-tagged H2A.W.6,  
558 H2A.13, and H2B.9 have been published [21, 22].

#### 559 **Overexpression and purification of recombinant histones and assembly of H2A-H2B** 560 **dimers**

561 Proteins were overexpressed in *E. coli* BL21 (DE3) overnight at 37°C. Histone purification was  
562 performed as previously described [79, 80]. Cells pellets were resuspended in sonication buffer  
563 1 (50 mM Tris-HCl pH8.0, 500 mM NaCl, 1 mM PMSF, 5% glycerol) and sonicated with 50%  
564 power for 5 min. After centrifugation at 15,000 rpm at 4°C for 20 min, pellets were resuspended  
565 in sonication buffer 1 and sonicated at 35% power for 2 min followed by centrifugation as  
566 before. The resulting pellets were resuspended in sonication buffer 2 (50 mM Tris-HCl pH 8.0,

567 500 mM NaCl, 7 M guanidine hydrochloride, 5% glycerol) and sonicated as described before.  
568 After the third sonication, the suspension was rotated at 4°C overnight. After centrifugation,  
569 the supernatants containing denatured proteins were mixed with Ni-NTA resin (Qiagen) and  
570 incubated for 60 min at 4°C. To remove the supernatant, the suspension was centrifuged. The  
571 resin was resuspended in wash buffer (50 mM Tris-HCl pH8.0, 500 mM NaCl, 6 M urea, 5%  
572 glycerol, 5 mM imidazole) and transferred into an Econo-column (BioRad). After washing with  
573 50 column volumes of wash buffer, proteins were eluted with elution buffer (50 mM Tris-HCl  
574 pH8.0, 500 mM NaCl, 6 M urea, 5% glycerol, 500 mM imidazole) and collected in 2 ml  
575 fractions. The fractions were analyzed on a 15% SDS-PAGE gel and those containing histones  
576 were pooled together and dialyzed against 4L of 10 mM Tris-HCl pH 7.5, 2 mM 2-  
577 mercaptoethanol at 4°C for 2 days. After checking the thrombin cleavage efficiency with  
578 different U/mg of thrombin, the estimated amount of thrombin was added to each sample and  
579 incubated for 3 hours at room temperature followed by analysis on a 15% SDS-PAGE gel.  
580 Proteins were further purified by cation ion exchange chromatography. The sample was applied  
581 to an SP sepharose column (GE Healthcare) connected to an Äkta system. The column was  
582 equilibrated and washed with equilibration buffer (20 mM CH<sub>3</sub>COONa pH5.2, 200 mM NaCl,  
583 6 M urea, 5 mM 2-mercaptoethanol, 1 mM EDTA). For elution, a linear gradient of 200-800  
584 mM NaCl in elution buffer (20 mM CH<sub>3</sub>COONa pH 5.2, 6 M urea, 5 mM β-mercaptoethanol,  
585 1 mM EDTA) was used. The fractions were again analyzed on a 15% SDS-PAGE gel. Histone  
586 containing fractions were pooled together and dialyzed against 4 L of 2 mM 2-mercaptoethanol  
587 4 times for 4 hours. Finally, the purified histones were freeze-dried.

588 For histone H2A-H2B dimer reconstitution, freeze-dried histones were resolved in  
589 unfolding buffer (20 mM Tris-HCl pH 7.5, 7 M guanidine hydrochloride, 20 mM 2-  
590 mercaptoethanol) at a concentration of 1 mg/ml at a 1:1 molar ratio and incubated for 2 hours  
591 at 4°C on a wheel. Samples were step-wise dialyzed against refolding buffer (20 mM, Tris-HCl  
592 pH 7.5, 1 mM EDTA, 0.1 M PMSF, 5%glycerol, 5 mM 2-mercaptoethanol) starting with 2 M

593 NaCl at 4°C overnight, followed by 1 M NaCl refolding buffer at 4°C for 4 hours, 0.5 M NaCl  
594 refolding buffer at 4°C for 4 hours, and finally against 0.1 M NaCl refolding buffer at 4°C  
595 overnight. Proteins were concentrated by centrifugation with a 10 kDa cut-off membrane  
596 (Merck Millipore) to a volume of 300 µl. The sample was applied to a Superdex200 gel  
597 filtration column in 0.1 M NaCl refolding buffer. Peak fractions were analyzed on a 15% SDS-  
598 PAGE gel and fractions containing the heterodimers were pooled together. The heterodimers  
599 were then concentrated by ultrafiltration (10 kDa cut-off) and, at the same time, the buffer was  
600 exchanged to kinase buffer. The final protein concentration was determined by measuring the  
601 absorbance at 280 nm and the quality was analyzed on a 15% SDS-PAGE gel.

#### 602 ***Schizosaccharomyces pombe* strains and media**

603 Unless otherwise stated, cells were grown in rich medium (YES). Gene replacement and  
604 tagging were performed by homologous recombination using a plasmid-based method [81]. The  
605 primers used are listed in S1 Table. In brief, pCloneNat1 and pCloneHyg1 were used to fuse  
606 the H2A.W.6 (*At*) C-terminal 21 amino acids to the endogenous C-terminus of *Sp*H2A.α and  
607 *Sp*H2A.β by using the natMX4 or hphMX4 cassette, respectively [25]. All constructed strains  
608 in this study were verified by PCR analysis and sequencing.

#### 609 ***S. pombe* chromatin fractionation assay**

610 Chromatin fractionation of WT and *Sp*H2A.W<sup>*At*</sup> strains was performed as previously described  
611 [82] and fractions were analyzed by western blotting using anti-αtubulin (T6199, Sigma), anti-  
612 H3 (ab1791, Abcam), and anti-H2A.W.6 (antibodies recognizing C-terminal KSPKKA motif).

#### 613 **Preparation of *S. pombe* whole cell extracts and acid extraction of histones for MS analysis**

614 Cells were disrupted by 0.5 mm glass beads in lysis buffer (50 mM Tris-HCl pH 7.5, 150 mM  
615 NaCl, 5 mM EDTA, 10% glycerol and 1 mM PMSF) and centrifuged at 14,000 × *g* for 15 min  
616 at 4°C. Supernatant was collected as a whole cell extract. Histones were analyzed by western  
617 blotting with antibodies against fission yeast-specific phosphoS129 of H2A (ab17353, Abcam),  
618 H2A.W.6p, and H3 (ab1791, Abcam). For mass spectrometry, histones from WT, *Sp*H2ACT,



619 *SpH2ACT-AA*, *SpH2A.W<sup>At</sup>*, and *SpH2A.W4A<sup>At</sup>* cells were prepared by the acid extraction and  
620 acetone precipitation method [83].

### 621 **Indirect immunofluorescence on *S. pombe* cells**

622 For detection of *SpH2A.W<sup>At</sup>* by immunofluorescence, cells expressing FLAG-tagged  
623 *SpH2A.W<sup>At</sup>* were fixed with 4% paraformaldehyde, digested to spheroplasts with zymolyase  
624 (Zymo Research), permeabilized with 1% Triton X-100, and incubated with an anti-Flag  
625 antibody (F1804, Sigma) as the primary antibody at a 1:100 dilution and anti-mouse IgG Alexa  
626 Fluor 488 as the secondary antibody (A11029, Life Technologies) at a 1:100 dilution. Cells  
627 were placed onto poly L-lysine-coated coverslips and DAPI stained. Microscopic analysis was  
628 performed using LSM700 laser scanning confocal microscope (Zeiss).

### 629 **Sensitivity of *S. pombe* strains to MMS**

630 Cells were grown in YES medium at 32°C until the exponential phase and for all strains the  
631 OD<sub>600</sub> was adjusted to 1.0. Five-fold serial dilutions were made with fresh YES and 2 µl were  
632 spotted on YES plates or YES plates containing 0.004% methyl methane sulfonate (MMS) and  
633 incubated at 32°C for 3 days.

### 634 **Peptide Pull Down assay**

635 6His-tagged Mdb1 recombinant protein was expressed in BL21 and purified using Ni-NTA  
636 beads (Qiagen) following manufacturer's instructions. As control, we synthesized two peptides  
637 corresponding to residues 120–132 of yeast H2A C-terminal tail, with serine 129 being  
638 unphosphorylated (termed as SQ) and phosphorylated (termed as SpQ). The other two peptides  
639 corresponding to residues 129–149 of H2A.W6 from *Arabidopsis*, with serine 145 being  
640 unphosphorylated (termed as KSPK) and phosphorylated (termed as KSpPK) together with  
641 SpQ peptide. All these peptides coupled with biotin at N-terminal. Twenty micrograms of each  
642 peptide were incubated with 20 µl of pre-washed Dynabeads M-280 Streptavidin (Invitrogen)  
643 at RT for 1 hour, then incubated with purified Mdb1 in peptide binding buffer (50 mM Tris-

644 HCl, pH 7.5, 100 mM NaCl, 0.05% NP-40) at 4°C for overnight. Beads were washed with  
645 peptide binding buffer and eluted with SDS loading buffer.

### 646 **Yeast Genetic interaction screening**

647 Large-scale crosses by SGA (synthetic genetic array) were carried out using the Bioneer haploid  
648 deletion mutant library (version 3.0) and the query strains WT and *spH2A.W<sup>At</sup>*. Manipulations  
649 were performed using a Singer RoToR colony pinning robot, essentially as described previously  
650 [84]. First, the library and query strains were arrayed in 384 colony format on YES agar  
651 containing 250 µg/ml G418 (Geneticin; Life Technologies, 10131027) or 100 µg/ml ClonNat  
652 (Nourseothricin; Jena Bioscience, AB-102XL) and 50 µg/ml Hygromycin B (Invitrogen/Life  
653 Technologies, 10687010), respectively. Mating between library and query strains, and selection  
654 of progeny was largely performed as previously reported [85]. Briefly, query and library stain  
655 cells were mixed in a drop of sterile H<sub>2</sub>O on SPAS plates and allowed to sporulate at 24°C for  
656 3 days. The resulting cell/spore mixture was incubated at 42°C for 7 days to enrich for spores  
657 and plated onto selective media to select for haploid progeny bearing the gene deletion and/or  
658 *spH2A.W<sup>At</sup>*. Finally, the selected haploid progeny was grown YES or YES supplemented with  
659 or 9 mM hydroxyurea (Sigma, H8627) at 32°C. For each individual screen with the WT and  
660 *spH2A.W<sup>At</sup>* query strains, technical duplicates were processed following the germination step,  
661 and each screen was repeated independently at least 3 times, resulting in a total number of n =  
662 6 screen for data analysis.

### 663 **Data analysis of the genetic screen and visualization**

664 SGA analysis was performed as previously described [86], with some modifications. Genetic  
665 interactions were assessed by colony growth on YES plates containing no additives (non-  
666 selective media; N/S) and YES plates containing formamide or hydroxyurea (treatment) and  
667 quantified by determining colony sizes (area) of digitalized pictures. As colonies at the edges  
668 of the plates show increased growth due to better availability of nutrients, the size of colonies

669 of the first and second outer most rims was corrected by multiplying with a correction factor.  
670 For calculating this factor, we determined the ratio between the median of all colonies in the  
671 middle of the plate (i.e., excluding the first and second rims) and the median of the first and  
672 second outer most rims. Next, the sensitivity towards stress conditions was determined by  
673 calculating the ratio between growth on ‘treatment’ and ‘N/S’ for each individual mutant; the  
674 obtained value for each mutant was then normalized to the median of the treatment: N/S values  
675 derived from all mutants of the same 384-plate. Finally, the entire dataset of each screen was  
676 then  $\log_2$ -transformed and median-normalized to all mutants from the entire screen (array). To  
677 select for robust genetic interactions, data from all screens, query strains and stress conditions  
678 were filtered to select for those mutants containing at least 80% of present values and show at  
679 least 5 absolute values higher or equal to 0.3 ( $\log_2$ ), resulting in the selection of 529 mutants.  
680 Next, hierarchical clustering of the genetic interaction dataset was performed using Euclidean  
681 distance as the similarity metric and complete linkage as the clustering method using Gene  
682 Cluster 3.0. Hierarchical cluster maps were visualized with Java TreeView (version 1.1.6) with  
683 negative and positive values represented in blue and yellow, respectively (grey: missing or N/A  
684 data).

685

## 686 **SUPPLEMENTARY DATA**

687 Supplementary Data are available at Journal Online.

## 688 **FUNDING**

689 FB acknowledges support from the next generation sequencing facilities at the Vienna  
690 BioCenter Core Facilities (VBCF), and the BioOptics facility and Molecular Biology Services  
691 from the Institute for Molecular Pathology (IMP), and Dr. J. Matthew Watson for proof-reading  
692 the manuscript. This work was also supported by the Gregor Mendel Institute (FB) and grant  
693 from Fonds zur Förderung der wissenschaftlichen Forschung (FWF) P26887, P28320, P30802,  
694 P32054, and TAI304 (BL, ZL and FB), and DK chromatin dynamics W1238 (AS). SB is a

695 member of the Collaborative Research Center SFB 1064 (Project-ID 213249687) funded by the  
696 Deutsche Forschungsgemeinschaft (DFG, German Research Foundation) and acknowledges  
697 infrastructural support. SB was supported by a grant by the German Research Foundation  
698 (DFG, BR 3511/4-1). The work in the Mechtler lab was financially supported by the EPIC-XS,  
699 project number 823839, the Horizon 2020 Program of the European Union, and the ERA-CAPS  
700 I 3686 project of the Austrian Science Fund.

## 701 **Authors contributions**

702 AS, BL and ZL performed experiments, and contributed data. FB, ZL, AS and BL interpreted  
703 data and wrote the manuscript. KM contributed Mass spectrometry analysis. MC and SB  
704 contributed the genetic screen and participated in revising the manuscript. PB and OM  
705 contributed the triple mutant line deprived of H2A.W. FB KM and SB were responsible for  
706 supervision.

## 707 **Acknowledgments**

708 We thank technical assistance from the Vienna Biocenter Core Facilities for Plant Science and  
709 the IMP/IMBA/GMI BioOptics and Protein Chemistry facilities for support (Ines Steinmacher,  
710 Susanne Opravil, Gabriela Krssakova, Otto Hudecz and Richard Imre).

711

## 712 **References**

- 713 1. Talbert PB, Henikoff S. Histone variants on the move: substrates for chromatin dynamics. *Nat*  
714 *Rev Mol Cell Biol.* 2017;18(2):115-26. doi: 10.1038/nrm.2016.148. PubMed PMID: 27924075.
- 715 2. Talbert PB, Meers MP, Henikoff S. Old cogs, new tricks: the evolution of gene expression in a  
716 chromatin context. *Nat Rev Genet.* 2019. doi: 10.1038/s41576-019-0105-7. PubMed PMID: 30886348.
- 717 3. Jiang D, Borg M, Lorkovic ZJ, Montgomery SA, Osakabe A, Yelagandula R, et al. The  
718 evolution and functional divergence of the histone H2B family in plants. *PLoS Genet.*  
719 2020;16(7):e1008964. Epub 2020/07/28. doi: 10.1371/journal.pgen.1008964. PubMed PMID:  
720 32716939; PubMed Central PMCID: PMC7410336.
- 721 4. Loppin B, Berger F. Histone Variants: The Nexus of Developmental Decisions and Epigenetic  
722 Memory. *Annu Rev Genet.* 2020;54:121-49. Epub 2020/08/29. doi: 10.1146/annurev-genet-022620-  
723 100039. PubMed PMID: 32857637.

- 724 5. Buschbeck M, Hake SB. Variants of core histones and their roles in cell fate decisions,  
725 development and cancer. *Nat Rev Mol Cell Biol.* 2017;18(5):299-314. doi: 10.1038/nrm.2016.166.  
726 PubMed PMID: 28144029.
- 727 6. Filipescu D, Muller S, Almouzni G. Histone H3 variants and their chaperones during  
728 development and disease: contributing to epigenetic control. *Annu Rev Cell Dev Biol.* 2014;30:615-46.  
729 doi: 10.1146/annurev-cellbio-100913-013311. PubMed PMID: 25288118.
- 730 7. Corujo D, Buschbeck M. Post-Translational Modifications of H2A Histone Variants and Their  
731 Role in Cancer. *Cancers (Basel).* 2018;10(3). doi: 10.3390/cancers10030059. PubMed PMID:  
732 29495465; PubMed Central PMCID: PMC5876634.
- 733 8. Dona M, Mittelsten Scheid O. DNA Damage Repair in the Context of Plant Chromatin. *Plant*  
734 *Physiol.* 2015;168(4):1206-18. Epub 2015/06/20. doi: 10.1104/pp.15.00538  
735 pp.15.00538 [pii]. PubMed PMID: 26089404; PubMed Central PMCID: PMC4528755.
- 736 9. Lorkovic ZJ, Berger F. Heterochromatin and DNA damage repair: Use different histone variants  
737 and relax. *Nucleus.* 2017;8(6):583-8. doi: 10.1080/19491034.2017.1384893. PubMed PMID:  
738 29077523; PubMed Central PMCID: PMC5788557.
- 739 10. Hauer MH, Gasser SM. Chromatin and nucleosome dynamics in DNA damage and repair.  
740 *Genes Dev.* 2017;31(22):2204-21. doi: 10.1101/gad.307702.117. PubMed PMID: 29284710; PubMed  
741 Central PMCID: PMC5769766.
- 742 11. Kim JJ, Lee SY, Miller KM. Preserving genome integrity and function: the DNA damage  
743 response and histone modifications. *Crit Rev Biochem Mol Biol.* 2019:1-34. doi:  
744 10.1080/10409238.2019.1620676. PubMed PMID: 31164001.
- 745 12. Stucki M, Clapperton JA, Mohammad D, Yaffe MB, Smerdon SJ, Jackson SP. MDC1 directly  
746 binds phosphorylated histone H2AX to regulate cellular responses to DNA double-strand breaks. *Cell.*  
747 2005;123(7):1213-26. doi: 10.1016/j.cell.2005.09.038. PubMed PMID: 16377563.
- 748 13. Peng G, Lin SY. BRIT1/MCPH1 is a multifunctional DNA damage responsive protein  
749 mediating DNA repair-associated chromatin remodeling. *Cell Cycle.* 2009;8(19):3071-2. doi:  
750 10.4161/cc.8.19.9411. PubMed PMID: 19755841; PubMed Central PMCID: PMC3419473.
- 751 14. Peng G, Yim EK, Dai H, Jackson AP, Burgt I, Pan MR, et al. BRIT1/MCPH1 links chromatin  
752 remodelling to DNA damage response. *Nat Cell Biol.* 2009;11(7):865-72. doi: 10.1038/ncb1895.  
753 PubMed PMID: 19525936; PubMed Central PMCID: PMC2714531.
- 754 15. Sawicka A, Seiser C. Sensing core histone phosphorylation - a matter of perfect timing. *Biochim*  
755 *Biophys Acta.* 2014;1839(8):711-8. doi: 10.1016/j.bbagr.2014.04.013. PubMed PMID: 24747175;  
756 PubMed Central PMCID: PMC4103482.
- 757 16. Lorkovic ZJ, Park C, Goiser M, Jiang D, Kurzbauer MT, Schlogelhofer P, et al.  
758 Compartmentalization of DNA Damage Response between Heterochromatin and Euchromatin Is  
759 Mediated by Distinct H2A Histone Variants. *Curr Biol.* 2017;27(8):1192-9. doi:  
760 10.1016/j.cub.2017.03.002. PubMed PMID: 28392109.
- 761 17. Redon C, Pilch DR, Rogakou EP, Orr AH, Lowndes NF, Bonner WM. Yeast histone 2A serine  
762 129 is essential for the efficient repair of checkpoint-blind DNA damage. *EMBO Rep.* 2003;4(7):678-  
763 84. Epub 2003/06/07. doi: 10.1038/sj.embor.embor871. PubMed PMID: 12792653; PubMed Central  
764 PMCID: PMC1326317.
- 765 18. Sofueva S, Du LL, Limbo O, Williams JS, Russell P. BRCT domain interactions with phospho-  
766 histone H2A target Crb2 to chromatin at double-strand breaks and maintain the DNA damage  
767 checkpoint. *Mol Cell Biol.* 2010;30(19):4732-43. Epub 2010/08/04. doi: 10.1128/MCB.00413-10.  
768 PubMed PMID: 20679485; PubMed Central PMCID: PMC2950532.
- 769 19. Wei Y, Wang HT, Zhai Y, Russell P, Du LL. Mdb1, a fission yeast homolog of human MDC1,  
770 modulates DNA damage response and mitotic spindle function. *PLoS One.* 2014;9(5):e97028. Epub  
771 2014/05/09. doi: 10.1371/journal.pone.0097028. PubMed PMID: 24806815; PubMed Central PMCID:  
772 PMC4013092.
- 773 20. Roitinger E, Hofer M, Kocher T, Pichler P, Novatchkova M, Yang J, et al. Quantitative  
774 phosphoproteomics of the ataxia telangiectasia-mutated (ATM) and ataxia telangiectasia-mutated and  
775 rad3-related (ATR) dependent DNA damage response in *Arabidopsis thaliana*. *Mol Cell Proteomics.*  
776 2015;14(3):556-71. Epub 2015/01/07. doi: 10.1074/mcp.M114.040352  
777 M114.040352 [pii]. PubMed PMID: 25561503; PubMed Central PMCID: PMC4349977.

- 778 21. Yelagandula R, Stroud H, Holec S, Zhou K, Feng S, Zhong X, et al. The histone variant H2A.W  
779 defines heterochromatin and promotes chromatin condensation in Arabidopsis. *Cell*. 2014;158(1):98-  
780 109. Epub 2014/07/06. doi: 10.1016/j.cell.2014.06.006  
781 S0092-8674(14)00727-2 [pii]. PubMed PMID: 24995981; PubMed Central PMCID: PMC4671829.
- 782 22. Osakabe A, Lorkovic ZJ, Kobayashi W, Tachiwana H, Yelagandula R, Kurumizaka H, et al.  
783 Histone H2A variants confer specific properties to nucleosomes and impact on chromatin accessibility.  
784 *Nucleic Acids Res*. 2018;46(15):7675-85. doi: 10.1093/nar/gky540. PubMed PMID: 29945241;  
785 PubMed Central PMCID: PMC6125630.
- 786 23. Kawashima T, Lorkovic ZJ, Nishihama R, Ishizaki K, Axelsson E, Yelagandula R, et al.  
787 Diversification of histone H2A variants during plant evolution. *Trends Plant Sci*. 2015;20(7):419-25.  
788 Epub 2015/05/20. doi: 10.1016/j.tplants.2015.04.005. PubMed PMID: 25983206.
- 789 24. Li Z, Kono H. Distinct Roles of Histone H3 and H2A Tails in Nucleosome Stability. *Sci Rep*.  
790 2016;6:31437. doi: 10.1038/srep31437. PubMed PMID: 27527579; PubMed Central PMCID:  
791 PMC614985630.
- 792 25. Lei B, Capella M, Montgomery SA, Borg M, Osakabe A, Goiser M, et al. A Synthetic Approach  
793 to Reconstruct the Evolutionary and Functional Innovations of the Plant Histone Variant H2A.W. *Curr*  
794 *Biol*. 2020. Epub 2020/10/24. doi: 10.1016/j.cub.2020.09.080. PubMed PMID: 33096036.
- 795 26. Douet J, Corujo D, Malinverni R, Renauld J, Sansoni V, Posavec Marjanovic M, et al.  
796 MacroH2A histone variants maintain nuclear organization and heterochromatin architecture. *J Cell Sci*.  
797 2017;130(9):1570-82. doi: 10.1242/jcs.199216. PubMed PMID: 28283545.
- 798 27. Fyodorov DV, Zhou BR, Skoultchi AI, Bai Y. Emerging roles of linker histones in regulating  
799 chromatin structure and function. *Nat Rev Mol Cell Biol*. 2018;19(3):192-206. doi:  
800 10.1038/nrm.2017.94. PubMed PMID: 29018282; PubMed Central PMCID: PMC615897046.
- 801 28. Kozlowski M, Corujo D, Hothorn M, Guberovic I, Mandemaker IK, Blessing C, et al.  
802 MacroH2A histone variants limit chromatin plasticity through two distinct mechanisms. *EMBO Rep*.  
803 2018;19(10). doi: 10.15252/embr.201744445. PubMed PMID: 30177554; PubMed Central PMCID:  
804 PMC6172464.
- 805 29. Roque A, Ponte I, Arrondo JL, Suau P. Phosphorylation of the carboxy-terminal domain of  
806 histone H1: effects on secondary structure and DNA condensation. *Nucleic Acids Res*.  
807 2008;36(14):4719-26. doi: 10.1093/nar/gkn440. PubMed PMID: 18632762; PubMed Central PMCID:  
808 PMC612504289.
- 809 30. Izzo A, Schneider R. The role of linker histone H1 modifications in the regulation of gene  
810 expression and chromatin dynamics. *Biochim Biophys Acta*. 2016;1859(3):486-95. doi:  
811 10.1016/j.bbagr.2015.09.003. PubMed PMID: 26348411.
- 812 31. Kotlinski M, Rutowicz K, Knizewski L, Palusinski A, Oledzki J, Fogtman A, et al. Histone H1  
813 Variants in Arabidopsis Are Subject to Numerous Post-Translational Modifications, Both Conserved  
814 and Previously Unknown in Histones, Suggesting Complex Functions of H1 in Plants. *PLoS One*.  
815 2016;11(1):e0147908. doi: 10.1371/journal.pone.0147908. PubMed PMID: 26820416; PubMed Central  
816 PMCID: PMC614731575.
- 817 32. Ausio J, Van Holde KE. The histones of the sperm of *Spisula solidissima* include a novel,  
818 cysteine-containing H-1 histone. *Cell Differ*. 1988;23(3):175-89. Epub 1988/04/01. doi: 10.1016/0045-  
819 6039(88)90070-x. PubMed PMID: 3378268.
- 820 33. Bonisch C, Hake SB. Histone H2A variants in nucleosomes and chromatin: more or less stable?  
821 *Nucleic Acids Res*. 2012;40(21):10719-41. Epub 2012/09/25. doi: 10.1093/nar/gks865. PubMed PMID:  
822 23002134; PubMed Central PMCID: PMC613510494.
- 823 34. Molaro A, Young JM, Malik HS. Evolutionary origins and diversification of testis-specific short  
824 histone H2A variants in mammals. *Genome Res*. 2018;28(4):460-73. doi: 10.1101/gr.229799.117.  
825 PubMed PMID: 29549088; PubMed Central PMCID: PMC615880237.
- 826 35. Lei B, Berger F. H2A Variants in Arabidopsis: Versatile Regulators of Genome Activity. *Plant*  
827 *Communications*. 2020;1(1). doi: <https://doi.org/10.1016/j.xplc.2019.100015>.
- 828 36. Baldi S, Becker PB. The variant histone H2A.V of *Drosophila*--three roles, two guises.  
829 *Chromosoma*. 2013;122(4):245-58. Epub 2013/04/05. doi: 10.1007/s00412-013-0409-x. PubMed  
830 PMID: 23553272.

- 831 37. Dantuma NP, van Attikum H. Spatiotemporal regulation of posttranslational modifications in  
832 the DNA damage response. *EMBO J.* 2016;35(1):6-23. Epub 2015/12/03. doi:  
833 10.15252/embj.201592595
- 834 embj.201592595 [pii]. PubMed PMID: 26628622; PubMed Central PMCID: PMC4717999.
- 835 38. Talbert PB, Henikoff S. Environmental responses mediated by histone variants. *Trends Cell*  
836 *Biol.* 2014;24(11):642-50. Epub 2014/08/26. doi: 10.1016/j.tcb.2014.07.006
- 837 S0962-8924(14)00120-2 [pii]. PubMed PMID: 25150594.
- 838 39. Muller S, Almouzni G. Chromatin dynamics during the cell cycle at centromeres. *Nat Rev*  
839 *Genet.* 2017;18(3):192-208. doi: 10.1038/nrg.2016.157. PubMed PMID: 28138144.
- 840 40. Jacob Y, Bergamin E, Donoghue MT, Mongeon V, LeBlanc C, Voigt P, et al. Selective  
841 methylation of histone H3 variant H3.1 regulates heterochromatin replication. *Science.*  
842 2014;343(6176):1249-53. doi: 10.1126/science.1248357. PubMed PMID: 24626927; PubMed Central  
843 PMCID: PMC4049228.
- 844 41. Borg M, Jacob Y, Susaki D, LeBlanc C, Buendia D, Axelsson E, et al. Targeted reprogramming  
845 of H3K27me3 resets epigenetic memory in plant paternal chromatin. *Nat Cell Biol.* 2020;22(6):621-9.  
846 Epub 2020/05/13. doi: 10.1038/s41556-020-0515-y. PubMed PMID: 32393884.
- 847 42. Yan A, Borg M, Berger F, Chen Z. The atypical histone variant H3.15 promotes callus formation  
848 in *Arabidopsis thaliana*. *Development.* 2020;147(11). Epub 2020/05/23. doi: 10.1242/dev.184895.  
849 PubMed PMID: 32439757.
- 850 43. Giaimo BD, Ferrante F, Herchenrother A, Hake SB, Borggreffe T. The histone variant H2A.Z in  
851 gene regulation. *Epigenetics Chromatin.* 2019;12(1):37. doi: 10.1186/s13072-019-0274-9. PubMed  
852 PMID: 31200754; PubMed Central PMCID: PMC6570943.
- 853 44. Zhang K, Sridhar VV, Zhu J, Kapoor A, Zhu JK. Distinctive core histone post-translational  
854 modification patterns in *Arabidopsis thaliana*. *PLoS One.* 2007;2(11):e1210. doi:  
855 10.1371/journal.pone.0001210. PubMed PMID: 18030344; PubMed Central PMCID:  
856 PMC2075165.
- 857 45. Shaltiel IA, Krenning L, Bruinsma W, Medema RH. The same, only different - DNA damage  
858 checkpoints and their reversal throughout the cell cycle. *J Cell Sci.* 2015;128(4):607-20. doi:  
859 10.1242/jcs.163766. PubMed PMID: 25609713.
- 860 46. Lanz MC, Dibitto D, Smolka MB. DNA damage kinase signaling: checkpoint and repair at 30  
861 years. *EMBO J.* 2019;38(18):e101801. doi: 10.15252/embj.2019101801. PubMed PMID: 31393028;  
862 PubMed Central PMCID: PMC6745504.
- 863 47. Meijer L, Borgne A, Mulner O, Chong JP, Blow JJ, Inagaki N, et al. Biochemical and cellular  
864 effects of roscovitine, a potent and selective inhibitor of the cyclin-dependent kinases cdc2, cdk2 and  
865 cdk5. *Eur J Biochem.* 1997;243(1-2):527-36. PubMed PMID: 9030781.
- 866 48. Joubes J, Chevalier C, Dudits D, Heberle-Bors E, Inze D, Umeda M, et al. CDK-related protein  
867 kinases in plants. *Plant Mol Biol.* 2000;43(5-6):607-20. PubMed PMID: 11089864.
- 868 49. Francis D. The plant cell cycle--15 years on. *New Phytol.* 2007;174(2):261-78. doi:  
869 10.1111/j.1469-8137.2007.02038.x. PubMed PMID: 17388890.
- 870 50. Nowack MK, Harashima H, Dissmeyer N, Zhao X, Bouyer D, Weimer AK, et al. Genetic  
871 framework of cyclin-dependent kinase function in *Arabidopsis*. *Dev Cell.* 2012;22(5):1030-40. doi:  
872 10.1016/j.devcel.2012.02.015. PubMed PMID: 22595674.
- 873 51. Dissmeyer N, Nowack MK, Pusch S, Stals H, Inze D, Grini PE, et al. T-loop phosphorylation  
874 of *Arabidopsis* CDKA;1 is required for its function and can be partially substituted by an aspartate  
875 residue. *Plant Cell.* 2007;19(3):972-85. doi: 10.1105/tpc.107.050401. PubMed PMID: 17369369;  
876 PubMed Central PMCID: PMC1867360.
- 877 52. Dissmeyer N, Weimer AK, Pusch S, De Schutter K, Alvim Kamei CL, Nowack MK, et al.  
878 Control of cell proliferation, organ growth, and DNA damage response operate independently of  
879 dephosphorylation of the *Arabidopsis* Cdk1 homolog CDKA;1. *Plant Cell.* 2009;21(11):3641-54. doi:  
880 10.1105/tpc.109.070417. PubMed PMID: 19948791; PubMed Central PMCID: PMC2798325.
- 881 53. Porceddu A, Stals H, Reichheld JP, Segers G, De Veylder L, Barroco RP, et al. A plant-specific  
882 cyclin-dependent kinase is involved in the control of G2/M progression in plants. *J Biol Chem.*  
883 2001;276(39):36354-60. doi: 10.1074/jbc.M011060200. PubMed PMID: 11477067.

- 884 54. Carr AM, Dorrington SM, Hindley J, Phear GA, Aves SJ, Nurse P. Analysis of a histone H2A  
885 variant from fission yeast: evidence for a role in chromosome stability. *Mol Gen Genet.*  
886 1994;245(5):628-35. PubMed PMID: 7808414.
- 887 55. Choe J, Schuster T, Grunstein M. Organization, primary structure, and evolution of histone H2A  
888 and H2B genes of the fission yeast *Schizosaccharomyces pombe*. *Mol Cell Biol.* 1985;5(11):3261-9.  
889 doi: 10.1128/mcb.5.11.3261. PubMed PMID: 3018512; PubMed Central PMCID: PMC369142.
- 890 56. Su Y, Wang S, Zhang F, Zheng H, Liu Y, Huang T, et al. Phosphorylation of Histone H2A at  
891 Serine 95: A Plant-Specific Mark Involved in Flowering Time Regulation and H2A.Z Deposition. *Plant*  
892 *Cell.* 2017;29(9):2197-213. doi: 10.1105/tpc.17.00266. PubMed PMID: 28790150; PubMed Central  
893 PMCID: PMC5635989.
- 894 57. Dong Q, Han F. Phosphorylation of histone H2A is associated with centromere function and  
895 maintenance in meiosis. *Plant J.* 2012;71(5):800-9. doi: 10.1111/j.1365-313X.2012.05029.x. PubMed  
896 PMID: 22519817.
- 897 58. Su H, Liu Y, Dong Q, Feng C, Zhang J, Liu Y, et al. Dynamic location changes of Bub1-  
898 phosphorylated-H2AThr133 with CENH3 nucleosome in maize centromeric regions. *New Phytol.*  
899 2017;214(2):682-94. doi: 10.1111/nph.14415. PubMed PMID: 28079247.
- 900 59. Yamagishi Y, Honda T, Tanno Y, Watanabe Y. Two histone marks establish the inner  
901 centromere and chromosome bi-orientation. *Science.* 2010;330(6001):239-43. doi:  
902 10.1126/science.1194498. PubMed PMID: 20929775.
- 903 60. Wang F, Higgins JM. Histone modifications and mitosis: countermarks, landmarks, and  
904 bookmarks. *Trends Cell Biol.* 2013;23(4):175-84. Epub 2012/12/19. doi: 10.1016/j.tcb.2012.11.005  
905 S0962-8924(12)00219-X [pii]. PubMed PMID: 23246430.
- 906 61. Aihara H, Nakagawa T, Mizusaki H, Yoneda M, Kato M, Doiguchi M, et al. Histone H2A T120  
907 Phosphorylation Promotes Oncogenic Transformation via Upregulation of Cyclin D1. *Mol Cell.*  
908 2016;64(1):176-88. doi: 10.1016/j.molcel.2016.09.012. PubMed PMID: 27716482.
- 909 62. Maeda K, Yoneda M, Nakagawa T, Ikeda K, Higashi M, Nakagawa K, et al. Defects in  
910 centromeric/pericentromeric histone H2A T120 phosphorylation by hBUB1 cause chromosome  
911 missegregation producing multinucleated cells. *Genes Cells.* 2018;23(10):828-38. doi:  
912 10.1111/gtc.12630. PubMed PMID: 30112853.
- 913 63. Wang H, Wang L, Erdjument-Bromage H, Vidal M, Tempst P, Jones RS, et al. Role of histone  
914 H2A ubiquitination in Polycomb silencing. *Nature.* 2004;431(7010):873-8. doi: 10.1038/nature02985.  
915 PubMed PMID: 15386022.
- 916 64. Nakagawa T, Kajitani T, Togo S, Masuko N, Ohdan H, Hishikawa Y, et al. Deubiquitylation of  
917 histone H2A activates transcriptional initiation via trans-histone cross-talk with H3K4 di- and  
918 trimethylation. *Genes Dev.* 2008;22(1):37-49. doi: 10.1101/gad.1609708. PubMed PMID: 18172164;  
919 PubMed Central PMCID: PMC2151013.
- 920 65. Zhou W, Zhu P, Wang J, Pascual G, Ohgi KA, Lozach J, et al. Histone H2A monoubiquitination  
921 represses transcription by inhibiting RNA polymerase II transcriptional elongation. *Mol Cell.*  
922 2008;29(1):69-80. doi: 10.1016/j.molcel.2007.11.002. PubMed PMID: 18206970; PubMed Central  
923 PMCID: PMC2327256.
- 924 66. Chu F, Nusinow DA, Chalkley RJ, Plath K, Panning B, Burlingame AL. Mapping post-  
925 translational modifications of the histone variant MacroH2A1 using tandem mass spectrometry. *Mol*  
926 *Cell Proteomics.* 2006;5(1):194-203. doi: 10.1074/mcp.M500285-MCP200. PubMed PMID: 16210244.
- 927 67. Ku M, Jaffe JD, Koche RP, Rheinbay E, Endoh M, Koseki H, et al. H2A.Z landscapes and dual  
928 modifications in pluripotent and multipotent stem cells underlie complex genome regulatory functions.  
929 *Genome Biol.* 2012;13(10):R85. doi: 10.1186/gb-2012-13-10-r85. PubMed PMID: 23034477; PubMed  
930 Central PMCID: PMC3491413.
- 931 68. Ogawa Y, Ono T, Wakata Y, Okawa K, Tagami H, Shibahara KI. Histone variant macroH2A1.2  
932 is mono-ubiquitinated at its histone domain. *Biochem Biophys Res Commun.* 2005;336(1):204-9. doi:  
933 10.1016/j.bbrc.2005.08.046. PubMed PMID: 16129414.
- 934 69. Pan MR, Peng G, Hung WC, Lin SY. Monoubiquitination of H2AX protein regulates DNA  
935 damage response signaling. *J Biol Chem.* 2011;286(32):28599-607. doi: 10.1074/jbc.M111.256297.  
936 PubMed PMID: 21676867; PubMed Central PMCID: PMC3151101.
- 937 70. Sarcinella E, Zuzarte PC, Lau PN, Draker R, Cheung P. Monoubiquitylation of H2A.Z  
938 distinguishes its association with euchromatin or facultative heterochromatin. *Mol Cell Biol.*



- 939 2007;27(18):6457-68. doi: 10.1128/MCB.00241-07. PubMed PMID: 17636032; PubMed Central  
940 PMCID: PMCPMC2099601.
- 941 71. Schwertman P, Bekker-Jensen S, Mailand N. Regulation of DNA double-strand break repair by  
942 ubiquitin and ubiquitin-like modifiers. *Nat Rev Mol Cell Biol.* 2016;17(6):379-94. doi:  
943 10.1038/nrm.2016.58. PubMed PMID: 27211488.
- 944 72. Wu CY, Kang HY, Yang WL, Wu J, Jeong YS, Wang J, et al. Critical role of  
945 monoubiquitination of histone H2AX protein in histone H2AX phosphorylation and DNA damage  
946 response. *J Biol Chem.* 2011;286(35):30806-15. doi: 10.1074/jbc.M111.257469. PubMed PMID:  
947 21690091; PubMed Central PMCID: PMCPMC3162441.
- 948 73. Nowack MK, Shirzadi R, Dissmeyer N, Dolf A, Endl E, Grini PE, et al. Bypassing genomic  
949 imprinting allows seed development. *Nature.* 2007;447(7142):312-5. doi: 10.1038/nature05770.  
950 PubMed PMID: 17468744.
- 951 74. Lampropoulos A, Sutikovic Z, Wenzl C, Maegele I, Lohmann JU, Forner J. GreenGate---a  
952 novel, versatile, and efficient cloning system for plant transgenesis. *PLoS One.* 2013;8(12):e83043.  
953 Epub 2014/01/01. doi: 10.1371/journal.pone.0083043. PubMed PMID: 24376629; PubMed Central  
954 PMCID: PMCPMC3869738.
- 955 75. Taus T, Kocher T, Pichler P, Paschke C, Schmidt A, Henrich C, et al. Universal and confident  
956 phosphorylation site localization using phosphoRS. *J Proteome Res.* 2011;10(12):5354-62. doi:  
957 10.1021/pr200611n. PubMed PMID: 22073976.
- 958 76. Kumagai-Sano F, Hayashi T, Sano T, Hasezawa S. Cell cycle synchronization of tobacco BY-  
959 2 cells. *Nat Protoc.* 2006;1(6):2621-7. doi: 10.1038/nprot.2006.381. PubMed PMID: 17406517.
- 960 77. Sauer M, Paciorek T, Benkova E, Friml J. Immunocytochemical techniques for whole-mount in  
961 situ protein localization in plants. *Nat Protoc.* 2006;1(1):98-103. doi: 10.1038/nprot.2006.15. PubMed  
962 PMID: 17406218.
- 963 78. Lorkovic ZJ, Hilscher J, Barta A. Use of fluorescent protein tags to study nuclear organization  
964 of the spliceosomal machinery in transiently transformed living plant cells. *Mol Biol Cell.*  
965 2004;15(7):3233-43. Epub 2004/05/11. doi: 10.1091/mbc.E04-01-0055  
966 E04-01-0055 [pii]. PubMed PMID: 15133128; PubMed Central PMCID: PMC452579.
- 967 79. Tachiwana H, Kagawa W, Osakabe A, Kawaguchi K, Shiga T, Hayashi-Takanaka Y, et al.  
968 Structural basis of instability of the nucleosome containing a testis-specific histone variant, human H3T.  
969 *Proc Natl Acad Sci U S A.* 2010;107(23):10454-9. doi: 10.1073/pnas.1003064107. PubMed PMID:  
970 20498094; PubMed Central PMCID: PMCPMC2890842.
- 971 80. Tanaka Y, Tawaramoto-Sasanuma M, Kawaguchi S, Ohta T, Yoda K, Kurumizaka H, et al.  
972 Expression and purification of recombinant human histones. *Methods.* 2004;33(1):3-11. doi:  
973 10.1016/j.ymeth.2003.10.024. PubMed PMID: 15039081.
- 974 81. Gregan J, Rabitsch PK, Rumpf C, Novatchkova M, Schleiffer A, Nasmyth K. High-throughput  
975 knockout screen in fission yeast. *Nat Protoc.* 2006;1(5):2457-64. doi: 10.1038/nprot.2006.385. PubMed  
976 PMID: 17406492; PubMed Central PMCID: PMCPMC2957175.
- 977 82. Kunoh T, Habu T. Pcf1, a large subunit of CAF-1, required for maintenance of checkpoint  
978 kinase Cds1 activity. *Springerplus.* 2014;3:30. doi: 10.1186/2193-1801-3-30. PubMed PMID:  
979 24478943; PubMed Central PMCID: PMCPMC3902073.
- 980 83. Pidoux A, Mellone B, Allshire R. Analysis of chromatin in fission yeast. *Methods.*  
981 2004;33(3):252-9. doi: 10.1016/j.ymeth.2003.11.021. PubMed PMID: 15157893.
- 982 84. Roguev A, Wiren M, Weissman JS, Krogan NJ. High-throughput genetic interaction mapping  
983 in the fission yeast *Schizosaccharomyces pombe*. *Nat Methods.* 2007;4(10):861-6. Epub 2007/09/26.  
984 doi: 10.1038/nmeth1098. PubMed PMID: 17893680.
- 985 85. Dixon SJ, Fedysyn Y, Koh JL, Prasad TS, Chahwan C, Chua G, et al. Significant conservation  
986 of synthetic lethal genetic interaction networks between distantly related eukaryotes. *Proc Natl Acad Sci*  
987 *U S A.* 2008;105(43):16653-8. Epub 2008/10/22. doi: 10.1073/pnas.0806261105. PubMed PMID:  
988 18931302; PubMed Central PMCID: PMCPMC2575475.
- 989 86. Barrales RR, Forn M, Georgescu PR, Sarkadi Z, Braun S. Control of heterochromatin  
990 localization and silencing by the nuclear membrane protein Lem2. *Genes Dev.* 2016;30(2):133-48. Epub  
991 2016/01/09. doi: 10.1101/gad.271288.115. PubMed PMID: 26744419; PubMed Central PMCID:  
992 PMCPMC4719305.

993 **Figure and legends**

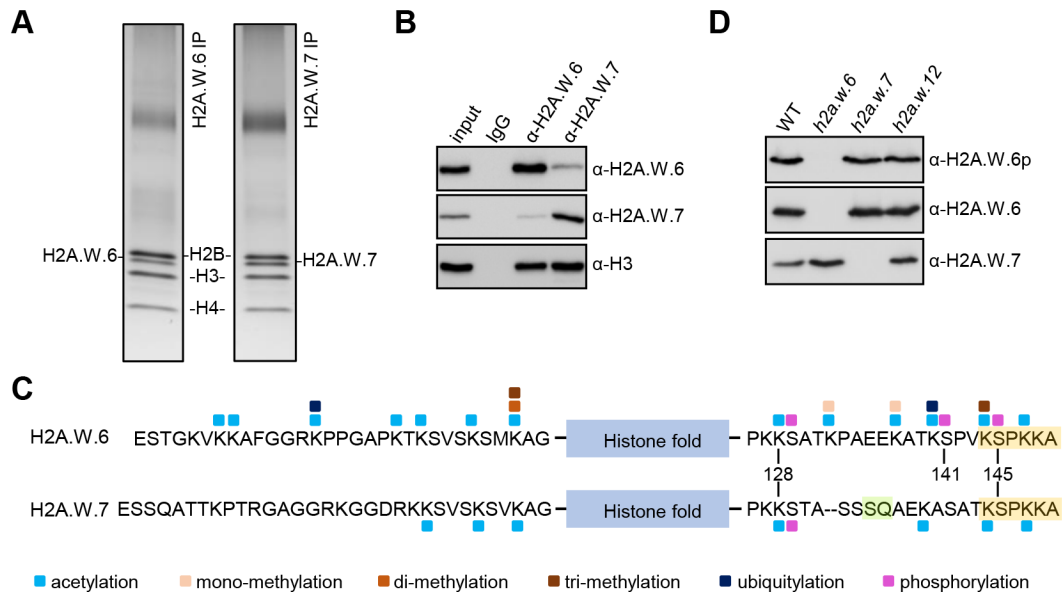

994

995 **Fig 1. H2A.W.6, but not H2A.W.7, is phosphorylated at the serine in the KSPK motif. (A)**

996 Silver stained gels of H2A.W.6 and H2A.W.7 mononucleosomes immunoprecipitated from

997 MNase digested nuclear extracts from leaves. Bands corresponding to H2A.W.6 and H2A.W.7

998 were excised and analyzed by mass spectrometry (MS). (B) Western blot analysis of

999 immunoprecipitates obtained with H2A.W.6 and H2A.W.7 specific antibodies from MNase

1000 digested WT nuclei. Note that H2A.W.6 and H2A.W.7 nucleosomes contain small amounts of

1001 H2A.W.7 and H2A.W.6, respectively, as previously reported [16, 22]. (C) Summary of all

1002 PTMs detected on H2A.W.6 and H2A.W.7. Amino acid sequence of N- and C-terminal tails of

1003 H2A.W.6 and H2A.W.7 are indicated with the conserved H2A.W KSPK motif and H2A.W.7

1004 SQ motif highlighted in orange and green, respectively. The blue box indicates the histone fold

1005 domain. Post-translational modifications detected by MS are color-coded as indicated at the

1006 bottom. (D) Western blot analysis of nuclear extract from twelve days old WT, *hta6*, *hta7*, and

1007 *hta12* mutant seedlings with antibodies against H2A.W.6p, H2A.W.6, and H2A.W.7.

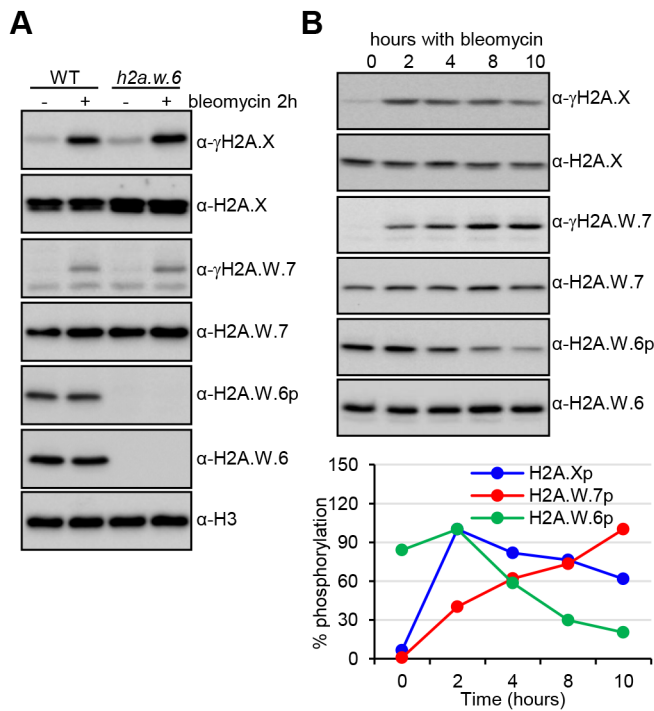

1008

1009 **Fig 2. Phosphorylation of the H2A.W KSPK motif is not induced by DNA damage. (A)**

1010 Phosphorylation of the KSPK motif on H2A.W.7 cannot be triggered by DNA damage. WT

1011 and *hta6* mutant seedlings were either mock or bleomycin (20  $\mu$ g/ml) treated for two hours and

1012 nuclear extracts were analyzed by western blotting with indicated antibodies. (B) *Arabidopsis*

1013 WT seedlings were treated with 20  $\mu$ g/ml of bleomycin for the indicated time periods and

1014 protein extracts were analyzed with the indicated antibodies. Levels of  $\gamma$ H2A.X,  $\gamma$ H2A.W.7,

1015 and H2A.W.6p (bottom panel) were quantified by normalization to the total level of the

1016 respective variant at each time point.

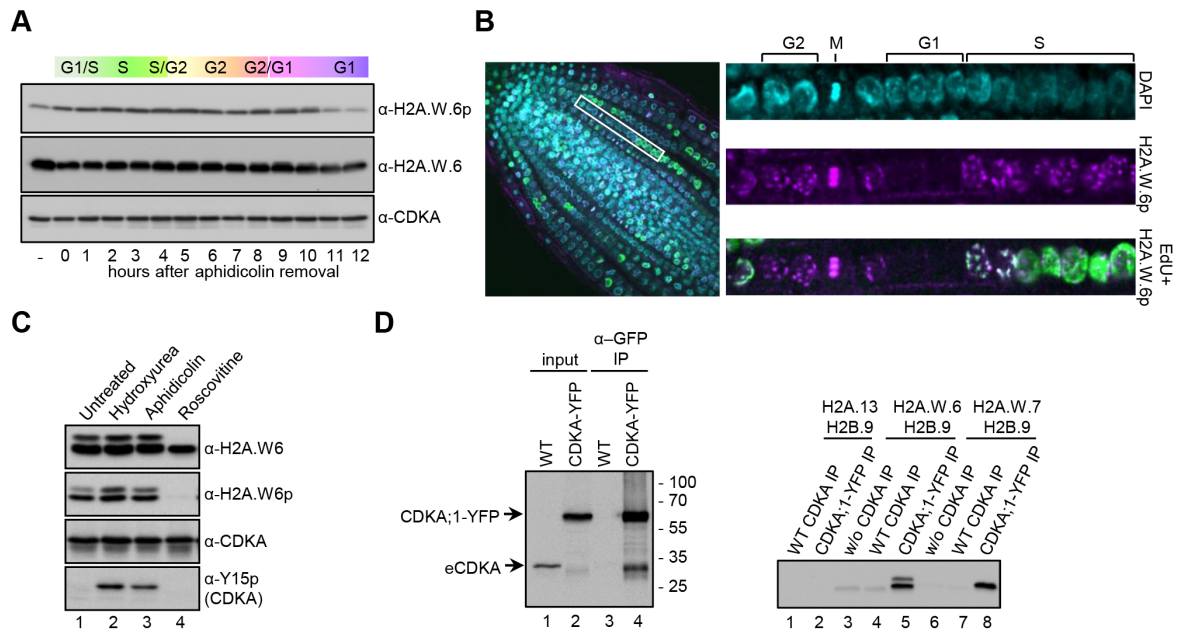

1017

1018 **Fig 3. H2A.W.6 is phosphorylated in a cell cycle dependent manner by cyclin dependent**

1019 **protein kinases (CDK).** (A) Phosphorylation of the KSPK motif is cell cycle dependent in

1020 tobacco BY-2 cell suspension culture. BY-2 cells were synchronized with 20 μg/ml aphidicolin

1021 for 24 hours. Protein extracts from samples taken in one-hour intervals after release of the block

1022 were analyzed by western blotting with the indicated antibodies. (B) Confocal images of WT

1023 root tips immunostained with H2A.W.6p antibody (magenta) after EdU (green) incorporation.

1024 Enlarged images of a row of cells in different cell cycle stages (indicated on the top) are shown

1025 on the right. (C) Protein extracts from *Arabidopsis* cell suspension treated with cell cycle

1026 inhibitors were analyzed by western blotting with the indicated antibodies. Inhibitory

1027 phosphorylation of CDK at tyrosine 15 (Y15) upon hydroxyurea and aphidicolin treatment

1028 (bottom panel, lanes 2 and 3) demonstrate the specificity and robustness of the assay. By

1029 contrast, roscovitine that inhibits the CDK activity directly by binding to the ATP binding

1030 pocket does not induce Y15 phosphorylation. (D) *Arabidopsis* CDKA;1-YFP was

1031 immunoprecipitated from whole cell extracts and detected with an anti-CDK antibody (left

1032 panel, lanes 2 and 4) and used in an *in vitro* kinase assay (right panel) with recombinant histone

1033 H2A-H2B dimers as indicated. Phosphorylation of the KSPKK motif was detected by western

1034 blotting with H2A.W.6p antibody. Note that GFP beads do not precipitate wild-type CDKA;1

1035 (left panel, lane 3) and consequently H2A.W.6p was not detected in kinase assays from these

1036 IPs (right panel, lanes 4 and 7).

1037

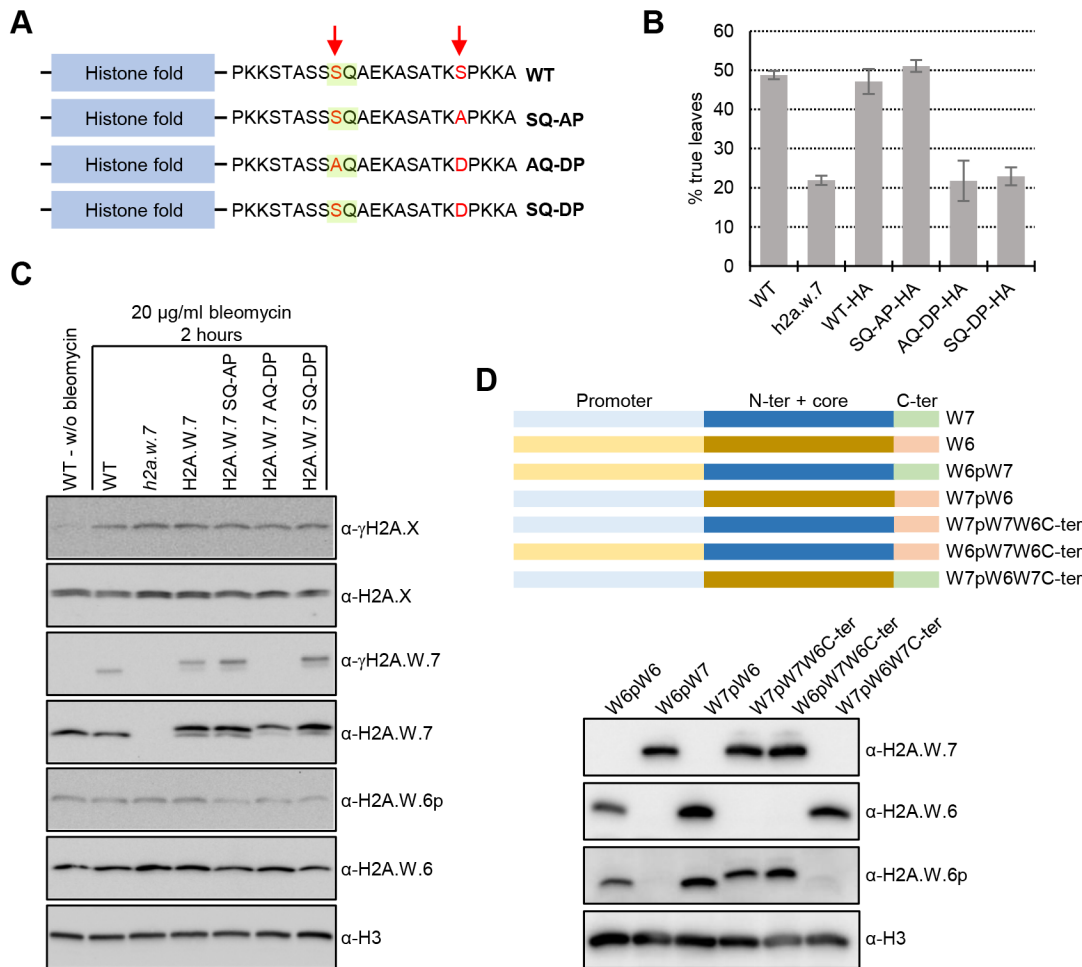

1038

1039 **Fig 4. Phosphomimic of KSPK phosphorylation results in DNA damage sensitivity in**  
 1040 ***planta*.** (A) Schematic diagrams of *Arabidopsis* H2A.W.7 variants containing mutated serin  
 1041 residues (in red) in the SQ (highlighted in green) and KSPK motifs. (B) Phosphomimic of the  
 1042 KSPK motif confers DNA damage sensitivity. Seeds from *h2a.w.7* mutants expressing HA-  
 1043 tagged WT H2A.W.7 or H2A.W.7 with mutations in the SQ and KSPK motifs were germinated  
 1044 in the presence of 50 mg/mL of zeocin and scored for true leaf development twelve days after  
 1045 germination. Data are represented as means  $\pm$ SD of three independent experiments with  $n > 400$   
 1046 seedlings. (C) Phosphomimic of the KSPK motif does not prevent SQ motif phosphorylation  
 1047 of H2A.W.7. Seedlings grown for 10 days on MS plates were treated for two hours with 20  
 1048 µg/ml of bleomycin and nuclear extracts were analyzed by western blotting with the indicated  
 1049 antibodies. (D) Primary sequence of the H2A.W C-terminal tail determines phosphorylation  
 1050 outcome of the KSPK motif. Schemes of promoter, histone core domain and C-terminal tail  
 1051 swaps between H2A.W.6 and H2A.W.7 (top panel). Western blot analysis of expression and  
 1052 KSPK motif phosphorylation of nuclear extracts from plants expressing indicated H2A.W swap  
 1053 versions in mutant plants deprived from H2A.W (bottom panel).

1054

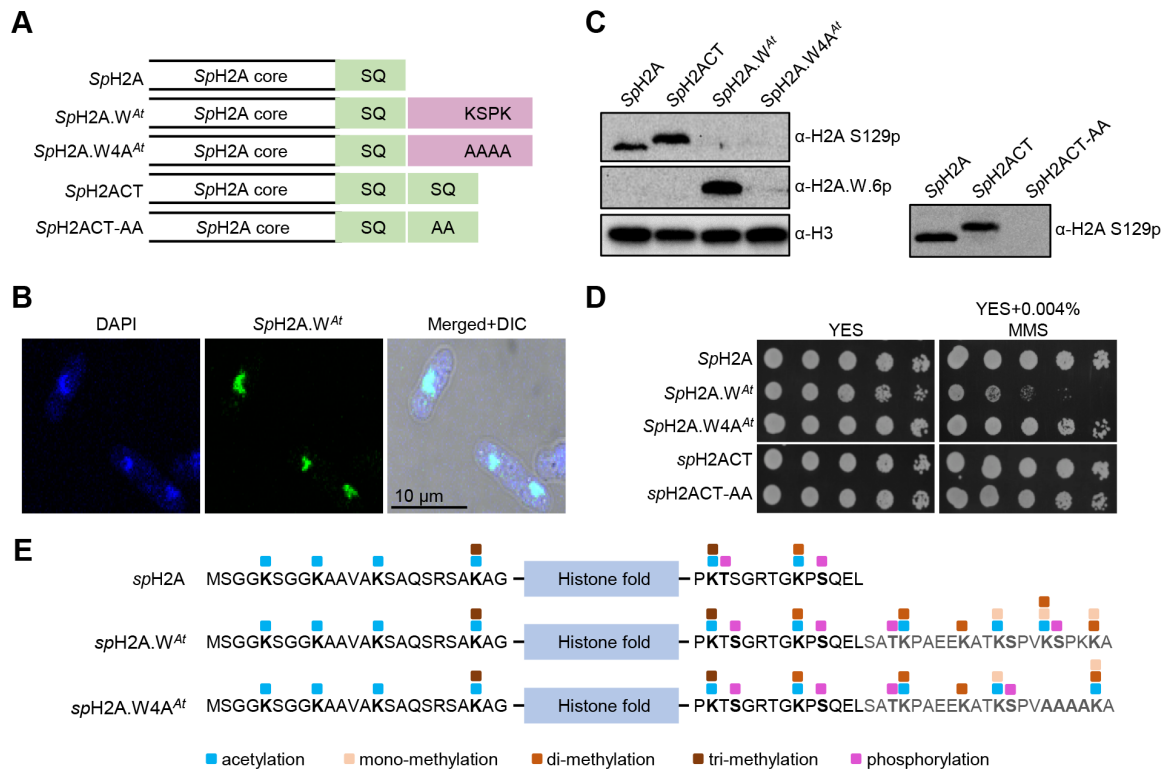

1055

1056 **Fig 5. Phosphorylation of the KSPK motifs results in DNA damage sensitivity in yeast.** (A)  
 1057 Schematic diagrams of fission yeast histone H2A (*SpH2A*) and mosaic versions containing  
 1058 either a duplicated C-terminal tail (*SpH2ACT*) or the C-terminal tail from *Arabidopsis*  
 1059 H2A.W.6 (*SpH2A.W<sup>At</sup>*). Mutant versions in the SQ and KSPK motifs of the latter two  
 1060 constructs, *SpH2ACT-AA* and *SpH2A.W4A<sup>At</sup>*, are also depicted. (B) *SpH2A.W<sup>At</sup>* localizes to  
 1061 the nucleus in fission yeast. Confocal images of immunostained cells from exponential phase  
 1062 are shown. 4',6-diamidino-2-phenylindole (DAPI) staining was used to visualize nuclei and  
 1063 differential interference contrast (DIC) for cell shape. (C) Analysis of *SpH2A* S129 (SQ) and  
 1064 of *SpH2A.W<sup>At</sup>* (KSPK) phosphorylation in indicated yeast strains. Cells were collected during  
 1065 exponential growth and whole cell extracts were analyzed with the indicated antibodies, using  
 1066 anti-histone H3 antibody as loading control. The lack of SQ phosphorylation signal in strains  
 1067 expressing *SpH2A.W<sup>At</sup>*, *SpH2A.W4A<sup>At</sup>*, and *SpH2ACT-AA* is due to the inability of the  
 1068 antibody to bind to the epitope. Phosphorylation of the SQ motif in these strains was confirmed  
 1069 by mass spectrometry (S5D Fig). (D) Phosphorylation of *SpH2A.W<sup>At</sup>* at the KSPK motif  
 1070 confers sensitivity to DNA damage. Serial dilutions of fission yeast cells expressing WT and  
 1071 indicated *SpH2A* mosaic variants were spotted onto either YES or YES plates containing  
 1072 0.004% methyl methane sulfonate (MMS) and incubated at 32°C for 3 days. (E) Summary of  
 1073 all PTMs detected on *SpH2A* in WT and chimeric histone in indicated yeast strains. Amino acid  
 1074 sequence of N- and C-terminal tails of chimeric histone are indicated with the conserved *SpH2A*  
 1075 SQ motif and H2A.W.6 KSPK motif respectively. The blue box indicates the histone fold  
 1076 domain. Post-translational modifications detected by MS are color-coded as indicated at the  
 1077 bottom.

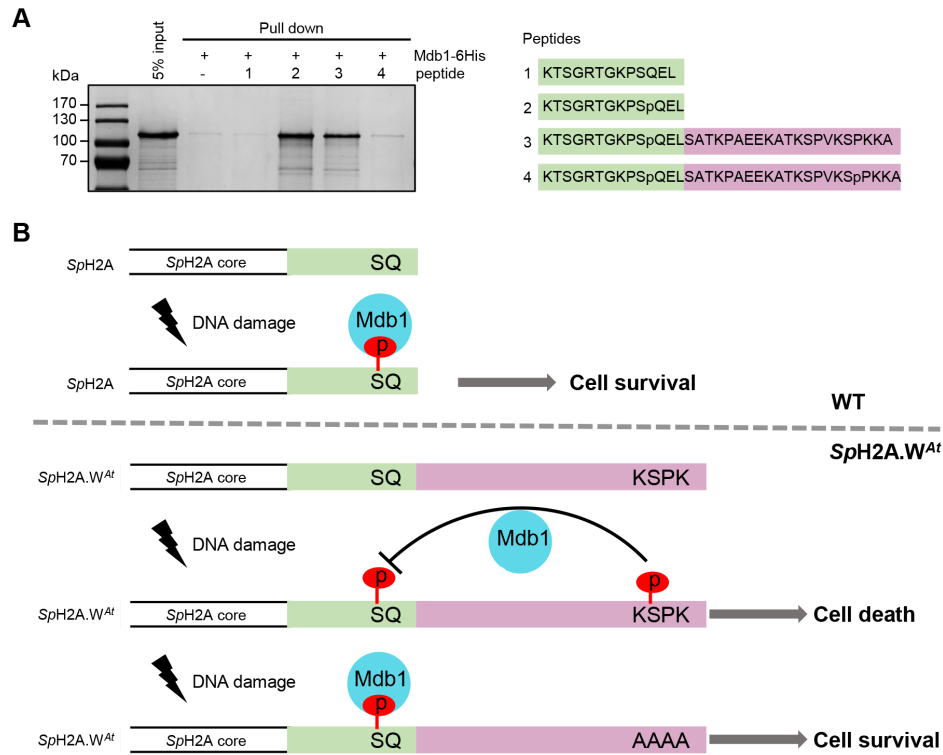

1078

1079 **Fig 6. KSPK motif directly interferes with binding of Mdb1 to phosphorylated SQ in a**  
 1080 **phosphorylation dependent manner.** (A) Mdb1 recombinant protein was expressed in *E. coli*  
 1081 BL21 and purified using Ni-NTA beads. Biotinylated peptides, as depicted on the right,  
 1082 corresponding to C terminus of *SpH2A*, with unmodified (SQ) or S129 phosphorylation (SpQ),  
 1083 or SpQ with unmodified KSPK motif (SpQ+KSPK) or SpQ with S145 phosphorylation  
 1084 (SpQ+KSpPK), were incubated with streptavidin Dynabeads and Mdb1 recombinant protein.  
 1085 The eluates were analyzed by SDS-PAGE with Coomassie staining. (B) The model of crosstalk  
 1086 between SQ and KSPK phosphorylation. In WT cell, S129 phosphorylation site recruit Mdb1  
 1087 as platform for downstream DDR in response to DNA damage. In *SpH2A.W<sup>At</sup>* cell, KSPK  
 1088 phosphorylation prevents the Mdb1 binding to SQ phosphorylation site, thus DNA cannot  
 1089 repair properly. In *SpH2A.W4A<sup>At</sup>* cell, the absence of KSPK phosphorylation allowed the  
 1090 Mdb1 binding to phosphorylated SQ to recruit DDR for DNA repair.

1091

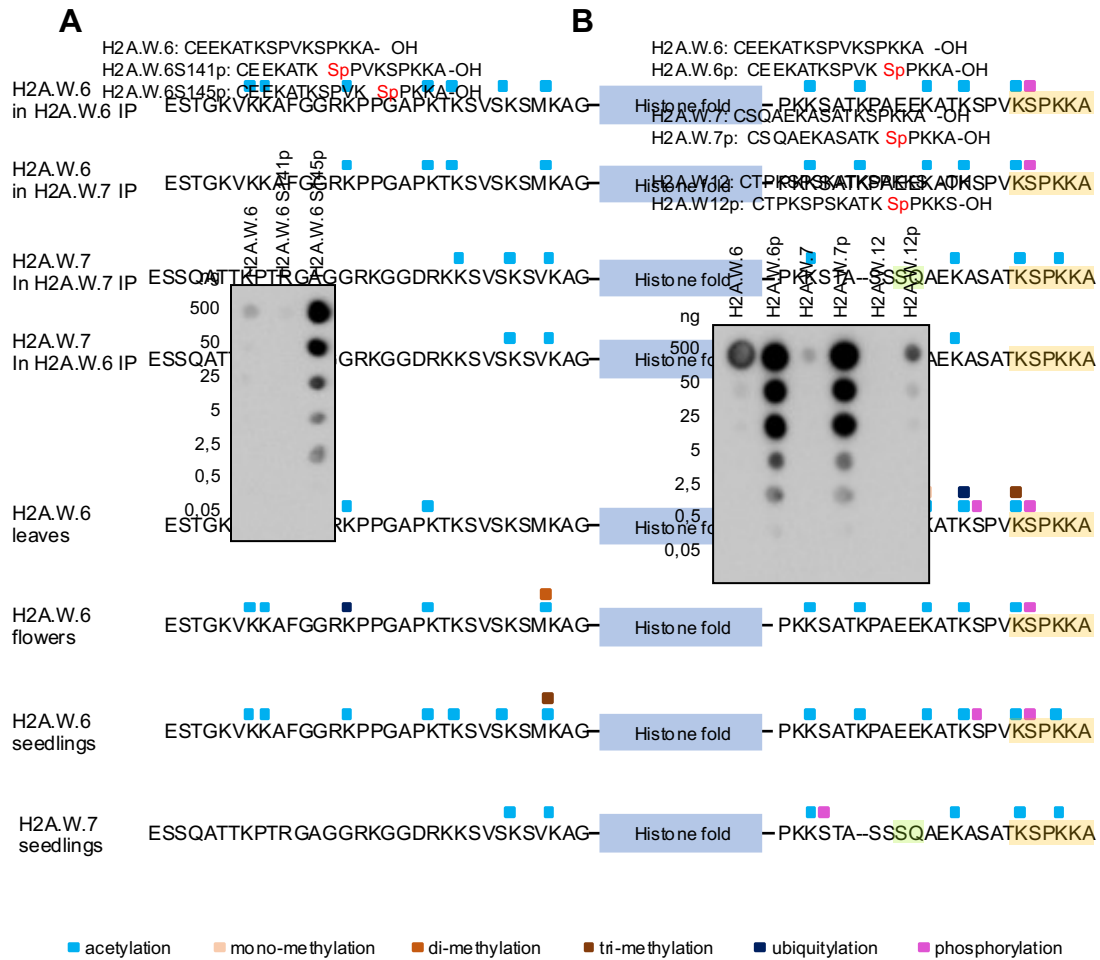

1092 **Supplemental Figures**

1093

1094 **S1 Fig. Mass spectrometry analysis of H2A.W.6 and H2A.W.7 modifications.** Summary of  
1095 all modifications detected with samples from leaves, flowers, and seedlings.

1096

1097

1098

1099

1100

1101

1102

1103



1104 **S2 Fig. Antibody against the phosphorylated serine 145 of H2A.W.6 is specific but**  
1105 **recognizes the phosphorylated KSPKKA motif of H2A.W.7.** (A) Affinity purified antibody  
1106 obtained after immunization of rabbits with the CEEKATKSPVKSpPKKA-OH peptide were  
1107 tested on dot blots with the serially diluted peptides indicated at the top. Note that  
1108 unphosphorylated peptide or peptide phosphorylated at serine 141 do not cross-react with the  
1109 affinity purified antibody. (B) The same purified antibody was tested against C-terminal  
1110 peptides in the unphosphorylated and phosphorylated forms from H2A.W.6, H2A.W.7, and  
1111 H2A.W.12 as above. Note that the H2A.W.7 but not the H2A.W.12 peptide cross reacts with  
1112 the H2A.W.6p antibody, indicating that the epitope recognized includes the C-terminal alanine  
1113 that is absent in H2A.W.12.

1114

1115

1116

1117

1118

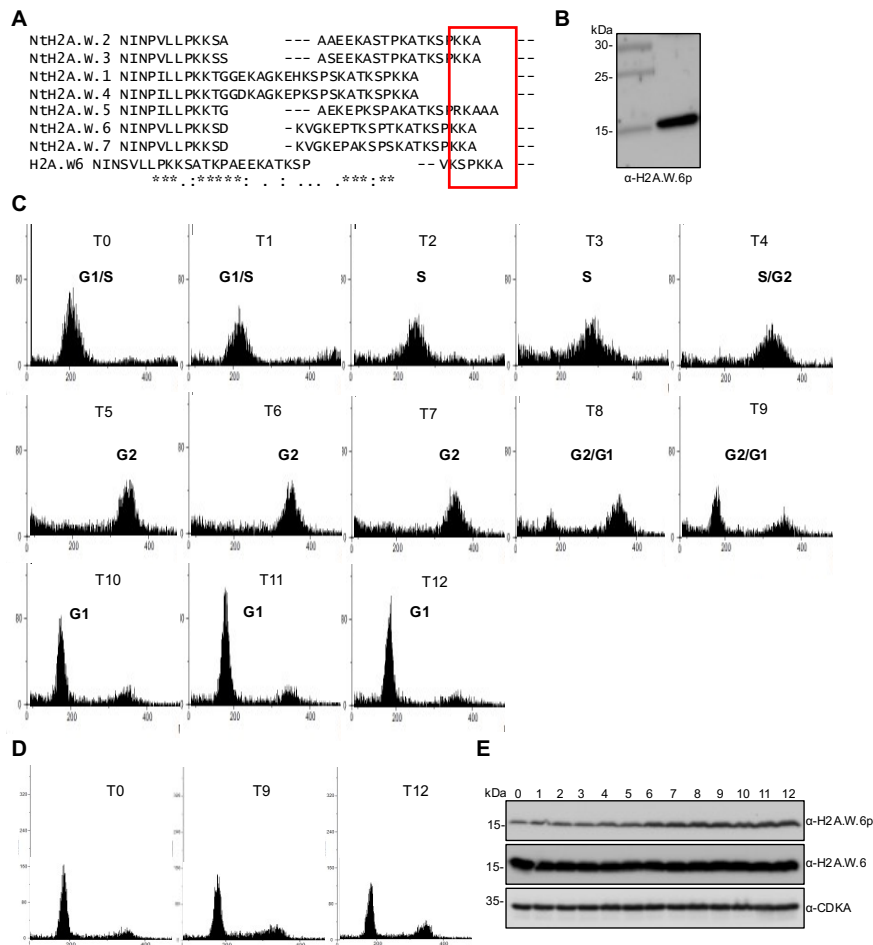

1119

1120 **S3 Fig. Phosphorylation of the KSPKK motif changes during the cell cycle.** (A) Protein  
 1121 sequence alignment of tobacco H2A.W isoforms with *Arabidopsis* H2A.W.6. Only the C-  
 1122 terminal tail is shown, with the conserved KSPKKA motif indicated in a red box. (B) Protein  
 1123 extracts from BY-2 cell suspension culture were analysed by western blotting with the anti-  
 1124 H2A.W.6p antibody. Colorimetric and chemiluminescence images were overlaid using the  
 1125 ChemiDoc software to align the position of the signal with the protein ladder. (C) Flow  
 1126 cytometry profiles of tobacco BY-2 cell after aphidicolin block and release. Cells were analysed  
 1127 in a time course as in Figure 3A. BY-2 suspension culture was blocked with 20 µg/ml  
 1128 aphidicolin for 24 hours. Upon removal of the aphidicolin block, cells proceeded through the  
 1129 cell cycle in a synchronized manner that was followed by flow cytometry during a 12 hours-  
 1130 time course. (D) Control BY-2 cell suspension culture treated with 1% DMSO for 24 hours and  
 1131 then followed over a twelve hour time course by flow cytometry. Only profiles for time points  
 1132 T0, T9, and T12 are shown. (E) Protein extracts from DMSO treated BY-2 cells were analyzed  
 1133 by western blotting with the indicated antibodies. Note that there is no fluctuation of  
 1134 phosphorylated H2A.W.6 (top panel) in unsynchronized cells compared to those synchronized  
 1135 by aphidicolin (see Figure 3A).  
 1136

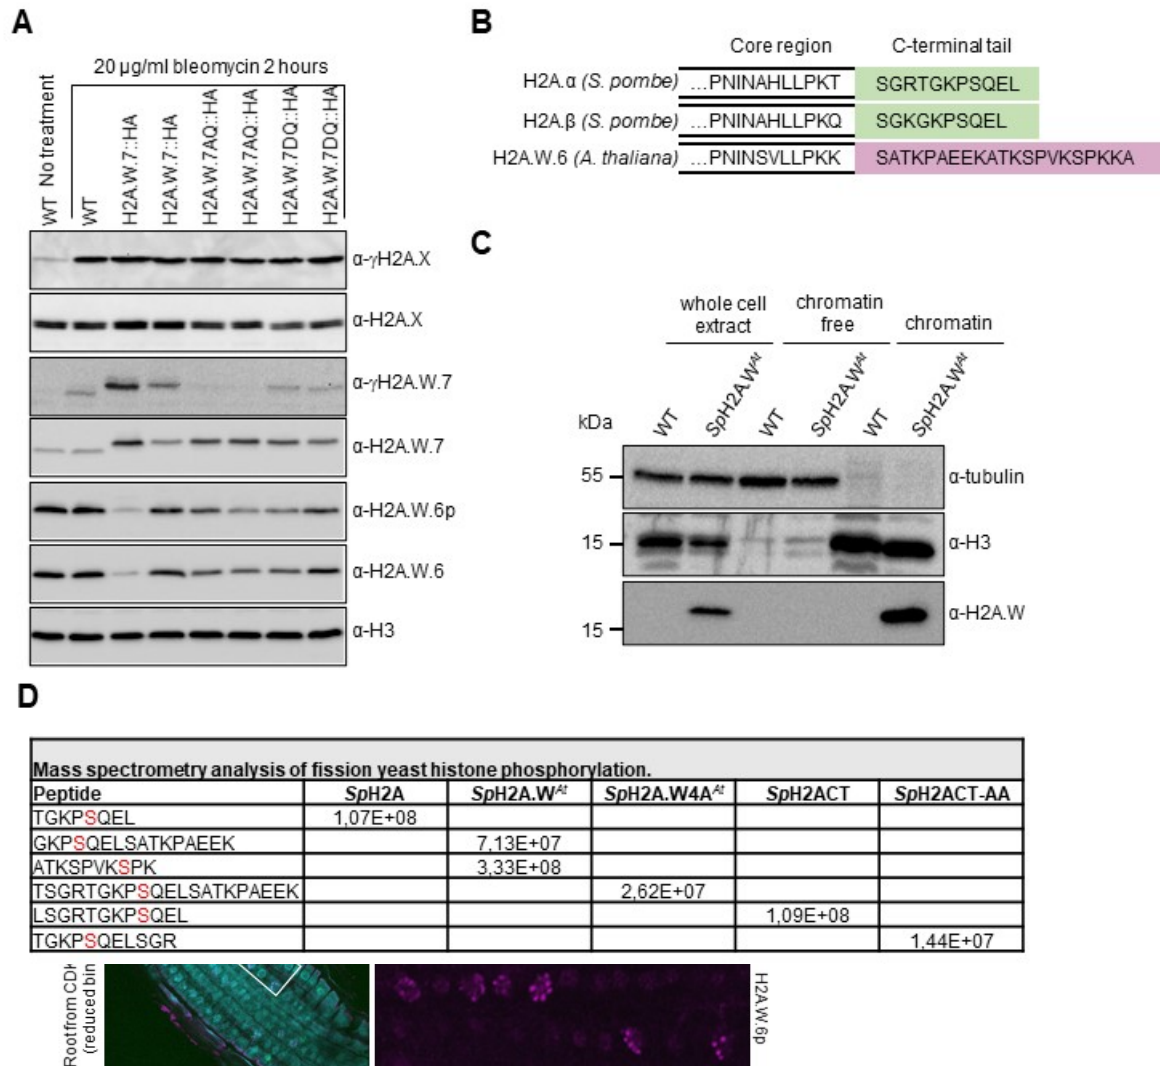

1137

1138 **S4 Fig. Phosphorylation of the H2A.W.6 KSPKK motif and expression of H2A.W.6 are**  
 1139 **linked to CDK activity in *Arabidopsis*.** (A) Root tips of WT plants were immunostained with  
 1140 the H2A.W.6 antibody. Note that all nuclei display H2A.W.6 signal. Single confocal sections  
 1141 of two root tips are shown. (B) One-week old *Arabidopsis* cell suspension culture was treated  
 1142 for 24 hours with the indicated concentrations of roscovitine, a potent inhibitor of cell cycle-  
 1143 dependent kinases. Protein extracts were analyzed by western blotting with H2A.W.6 and  
 1144 H2A.W.6p specific antibodies. (C) Transgenic plants expressing weak hypomorphic mutants  
 1145 of CDKA;1, named D and DE, in the *cdka;1* mutant background [51, 52], were genotyped to  
 1146 identify heterozygous and homozygous plants (Tg<sup>9+/-</sup> and Tg<sup>9-/-</sup>). Nuclear protein extracts  
 1147 from 2-weeks old seedlings were analyzed by western blotting with the indicated antibodies.  
 1148 (D) CDKB;1, which is active at the G2/M transition, also phosphorylates the KSPKK motif of  
 1149 H2A.W.6. Root tips of plants expressing the CDKA;1 T161A hypomorphic mutant that results  
 1150 in reduced substrate binding were immunostained with the H2A.W.6p antibody (magenta) after  
 1151 EdU incorporation (green). Enlarged images on the right demonstrate the presence of  
 1152 H2A.W.6p in G2 nuclei but not in S phase nuclei labeled with EdU. A single confocal section  
 1153 is shown.

1154

1155 **S5 Fig. Analysis of KSPKK phosphorylation *in planta* and in *S. pombe*.** (A) Analysis of  
1156  $\gamma$ H2A.X,  $\gamma$ H2A.W.7, and H2A.W.6p in transgenic seedlings expressing H2A.W.7  
1157 hypomorphic mutants in the SQ motif [16] after treatment with 20  $\mu$ g/ml of bleomycin for 2  
1158 hours. Note that bleomycin treatment does not induce phosphorylation of the KSPKK motif on  
1159 either WT H2A.W.7 or the AQ and DQ mutants of H2A.W.7; this band would be shifted above  
1160 endogenous H2A.W.6p due to the presence of the HA tag. (B) Schematic diagrams of two *S.*  
1161 *pombe* H2A variants and *Arabidopsis* H2A.W.6 with the indicated C-terminal tail sequences  
1162 used for creation of the mosaic H2A variants depicted in Figure 4A. (C) Analysis of *Sp*H2A.W<sup>At</sup>  
1163 association with the chromatin. Whole cell, chromatin free, and chromatin bound fractions from  
1164 *Sp*H2A and *Sp*H2A.W<sup>At</sup> strains were analyzed by western blotting with the indicated antibodies.  
1165 Tubulin and histone H3 were used as cytoplasmic and nuclear controls, respectively. (D) MS  
1166 analysis of *Sp*H2A SQ motif phosphorylation in fission yeast strains expressing the indicated  
1167 mosaic or mutated H2A variants. Highly similar levels, quantified as peak areas, of peptides  
1168 covering phosphorylated SQ motif were measured in all strains.

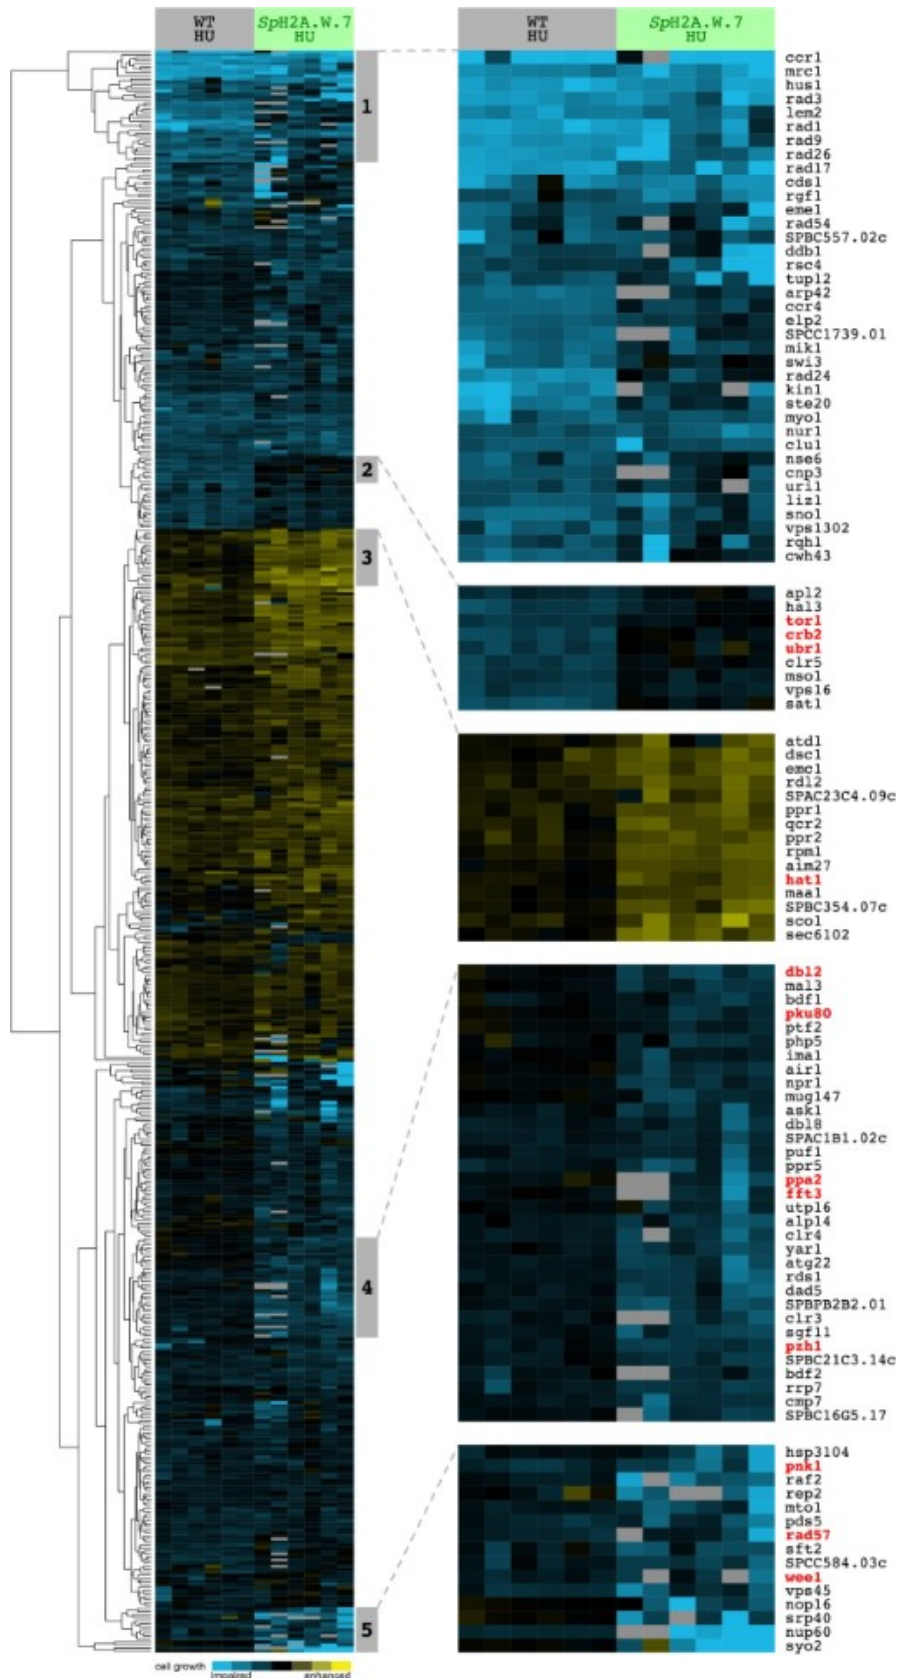

1169

1170 **S6 Fig. Cluster analysis of the SGA screen for deletion mutant that suppress growth of**  
 1171 **spH2A.Wat in 8mM HU plates.**
